# Supplementary material for: Synthesis, structure and properties of coordination complexes of tin(ii) phthalocyanine and naphthalocyanine with transition metal fragments
Source: Royal Society of Chemistry journal article supplement (doi:10.1039/d3ce00564j), 2023-01-01
Supplement: d3ce00564j1.pdf [file d3ce00564j1.pdf]

## Supporting information.

### Experimental.

**Materials.** Tin(II) phthalocyanine ( $\text{Sn}^{\text{II}}\text{Pc}$ , TCI), tin(VI) phthalocyanine dichloride ( $\text{Sn}^{\text{VI}}\text{Cl}_2\text{Pc}$ , TCI), tin(VI) naphthalocyanine dichloride ( $\text{Sn}^{\text{VI}}\text{Cl}_2\text{Nc}$ , >95%, TCI), tetrabutylammonium bromide (TBABr, >99%, Aldrich), tetrabutylammonium chloride (TBACl, >99%, Aldrich), 4,7,13,16,21,24-hexaoxa-1,10-diazabicyclo[8.8.8]hexacosane (Cryptand[2.2.2], >99%, TCI), bis(pentamethylcyclopentadienyl) cobalt(II) ( $\text{Cp}^*_2\text{Co}$ , Sigma-Aldrich), bis(pentamethylcyclopentadienyl) chromium(II) ( $\text{Cp}^*_2\text{Cr}$ , >95%, Strem), (pentamethylcyclopentadienyl) iridium(III) dichloride dimer ( $\{\text{Cp}^*\text{IrCl}_2\}_2$ , >95%, TCI), diiodo(pentamethylcyclopentadienyl)iridium(III) dimer ( $\{\text{Cp}^*\text{IrI}_2\}_2$ , Sigma-Aldrich), dichloro(pentamethylcyclopentadienyl)iridium(III) dimer ( $\{\text{Cp}^*\text{IrCl}_2\}_2$ , >95%, TCI), cyclopentadienylvanadium tetracarbonyl ( $\text{CpV}(\text{CO})_4$ , >97%, Aldrich), cyclopentadienylmolybdenum tricarbonyl dimer ( $\{\text{CpMo}(\text{CO})_3\}_2$ , >98%, Strem), chloro(1,5-cyclooctadiene)iridium(I) dimer ( $\{(\text{COD})\text{IrCl}\}_2$ , >99%, Strem), dichloro(benzene)ruthenium(II) dimer ( $\{(\text{C}_6\text{H}_6)\text{RuCl}_2\}_2$ , >98%, Strem), triirondodecacarbonyl ( $\text{Fe}_3(\text{CO})_{12}$ , contains 1-10% of methanol, Sigma-Aldrich), osmium carbonyl ( $\text{Os}_3(\text{CO})_{12}$ , >99%, Strem), iridium carbonyl ( $\text{Ir}_4(\text{CO})_{12}$ , >98%, Strem), violanthrone (98%, TCI), and potassium graphite ( $\text{KC}_8$ , Strem) were used as received. Sodium fluorenone ketyl was obtained according to Ref. [1]. Solvents were purified in an argon atmosphere and degassed. *o*-Dichlorobenzene ( $\text{C}_6\text{H}_4\text{Cl}_2$ ) was distilled over  $\text{CaH}_2$  under reduced pressure, benzonitrile was distilled over Na under reduced pressure, and *n*-hexane was distilled over Na/benzophenone. All manipulations for the syntheses of **1-13** were carried out in an MBraun 150B-G glove box with a controlled argon atmosphere and the content of  $\text{H}_2\text{O}$  and  $\text{O}_2$  less than 1 ppm. The solvents and crystals were stored in a glove box. Polycrystalline samples of **6**, **10-12** were placed in quartz tubes of 2 mm diameter under argon and sealed at ambient pressure for SQUID and EPR measurements.

KBr pellets for IR- and UV-visible-NIR measurements for **2-13** were prepared in a glove box.

**General.** UV-visible-NIR spectra of **2-13** were measured in KBr pellets on a Perkin Elmer Lambda 1050 spectrometer in the 250-2500 nm range. FT-IR spectra of **2-13** were obtained in KBr pellets with a Perkin-Elmer Spectrum 400 spectrometer (400-7800  $\text{cm}^{-1}$ ). A Quantum Design MPMS-XL SQUID magnetometer was used to measure static magnetic susceptibility of **6, 10-12** at 100 mT magnetic field in cooling and heating conditions in the 300 – 1.9 K range. A sample holder contribution and core temperature-independent diamagnetic susceptibility ( $\chi_d$ ) were subtracted from the experimental values. The  $\chi_d$  values were estimated by the extrapolation of the data in the high-temperature range by fitting the data with the expression:  $\chi_M = C/(T - \Theta) + \chi_d$ , where  $C$  is Curie constant and  $\Theta$  is Weiss temperature. Effective magnetic moment ( $\mu_{\text{eff}}$ ) was calculated with the following formula:  $\mu_{\text{eff}} = (8\chi_M T)^{1/2}$ .

**Synthesis.** The crystals of **1-13** were obtained by diffusion technique. A reaction mixture was cooled down to room temperature and filtered into a glass tube for diffusion of 1.8 cm diameter and 50 mL volume with a ground glass plug, and then 30 mL of *n*-hexane was layered over the solution. Slow mixing of two solutions resulted in precipitation of the crystals over 1-2 months. The solvent was then decanted from the crystals, and they were washed with several portions of *n*-hexane. The compositions of the obtained complexes were determined from X-ray diffraction analysis on a single crystal. Several crystals from each synthesis tested by X-ray diffraction were found to consist of one single crystalline phase. The determined composition was confirmed by elemental analysis for relatively stable complexes **2-5**. Due to high air sensitivity of **6-13** elemental analysis could not be used to confirm the composition because they reacted with oxygen in the air before the quantitative oxidation procedure could be performed. That is explained by the presence of air-sensitive  $\text{Pc}^{\bullet 3-}$  radical trianions and metal fragments.

Previously  $\{\text{Cp}^*\text{Ir}^{\text{III}}\text{I}_2 \cdot \text{Sn}^{\text{II}}(\text{Pc}^{2-})\} \cdot 2\text{C}_6\text{H}_4\text{Cl}_2$  was obtained and structurally characterized by reduction of fullerene  $\text{C}_{70}$  and  $\text{Sn}^{\text{II}}\text{Pc}$  with sodium fluorenone ketyl in the presence of TBABr with the following interaction of the obtained reaction mixture with the  $\{\text{Cp}^*\text{Ir}^{\text{III}}\text{I}_2\}_2$  dimer.<sup>2</sup> We carried out a similar reaction with the  $\{\text{Cp}^*\text{Ir}^{\text{III}}\text{Cl}_2\}_2$  dimer and violanthrone dye trying to obtain a three-component complex based on them. In this case a small amount of good quality crystals of solvent free phase  $[\text{Cp}^*\text{Ir}^{\text{III}}\text{Cl}_2 \cdot \text{Sn}^{\text{II}}(\text{Pc}^{2-})]$  (**1**) was obtained. The reduction of tin(II) phthalocyanine (26.6 mg, 0.042 mmol) and violanthrone (19.1 mg, 0.042 mmol) in 17 ml of  $\text{C}_6\text{H}_4\text{Cl}_2$  with sodium fluorenone ketyl (22 mg, 0.108 mmol) in the presence of two equivalents of TBABr (26.8 mg, 0.084 mmol) during one day at  $60^\circ\text{C}$  yielded deep blue solution. This solution was filtered into a flask containing the  $(\text{Cp}^*\text{Ir}^{\text{III}}\text{Cl}_2)_2$  dimer (16.8 mg, 0.022 mmol). The solution was mixed additionally for 24 hours to form a green solution. Slow mixing with *n*-hexane produced a small amount of black blocks of good quality but in low yield (only several single crystals were obtained). Since these crystals had unit cell parameters differing from those of previously studied  $\{\text{Cp}^*\text{Ir}^{\text{III}}\text{I}_2 \cdot \text{Sn}^{\text{II}}(\text{Pc}^{2-})\} \cdot 2\text{C}_6\text{H}_4\text{Cl}_2$ ,<sup>1</sup> we investigated crystal structure of **1**. That was the new solvent free phase  $[\text{Cp}^*\text{Ir}^{\text{III}}\text{Cl}_2 \cdot \text{Sn}^{\text{II}}(\text{Pc}^{2-})]$  (**1**). Here we present only its crystal structure.

For the preparation of the crystals of  $[\text{Cp}^*\text{Ir}^{\text{III}}\text{I}_2 \cdot \text{Sn}^{\text{II}}(\text{Pc}^{2-})] \cdot \text{C}_6\text{H}_4\text{Cl}_2$  (**2**), tin(II) phthalocyanine (26.6 mg, 0.042 mmol) and half equivalent of the  $(\text{Cp}^*\text{Ir}^{\text{III}}\text{I}_2)_2$  dimer (24.3 mg, 0.021 mmol) were stirred during 24 hours at  $50^\circ\text{C}$ . Phthalocyanine dissolved to form a green solution. Slow mixing with *n*-hexane produced black blocks of good quality which were isolated, washed with *n*-hexane and dried (62% yield). Previously crystals of another phase  $\{\text{Cp}^*\text{Ir}^{\text{III}}\text{I}_2 \cdot \text{Sn}^{\text{II}}(\text{Pc}^{2-})\} \cdot 2\text{C}_6\text{H}_4\text{Cl}_2$  were obtained in other experimental conditions.<sup>2</sup> Since obtained crystals of **2** had different unit cell parameters, we investigated the crystal structure of **2**. That was a phase with a lower content of *o*-dichlorobenzene molecules. Crystals were obtained in a 38% yield as black plates. Composition determined from X-ray diffraction on a single crystal

was confirmed by elemental analysis:  $C_{48}H_{35}Cl_2I_2IrN_8Sn$ ,  $M_r = 1359.43$ . Calculated: C, 42.41; H, 2.57; N, 8.24; Found: C, 42.21; H, 2.34; N, 7.98.

The crystals of  $[CpV(CO)_3 \cdot Sn^{II}(Pc^{2-})] \cdot C_6H_4Cl_2$  (**3**) were obtained by the interaction of tin(II) phthalocyanine (26.6 mg, 0.042 mmol) and two equivalents of  $CpV(CO)_4$  (19 mg, 0.084 mmol) in 17 ml of  $C_6H_4Cl_2$  during one day at 50°C. Phthalocyanine dissolved to form deep green solution. Crystals of **3** were obtained as black plates in a 52% yield. The composition of **3** determined from X-ray diffraction on a single crystal was confirmed by elemental analysis:  $C_{46}H_{25}Cl_2N_8O_3SnV$ ,  $M_r = 978.27$ . Calculated: C, 56.47; H, 2.55; N, 11.45, Cl 7.26; Found: C, 56.11; H, 2.31; N, 11.22; Cl 7.04.

Since previously obtained complex  $[(Cp^*Mo^{II}(CO)_2Br \cdot Sn^{II}(Pc^{2-})) \cdot 0.5C_6H_4Cl_2]$  (**16**) contained a non-integer amount of Br (approximately 0.83 per formula unit),<sup>3</sup> we tried to substitute bromide anions at  $Mo^{II}$  atoms by chloride anions. The crystals of  $[CpMo^{II}(CO)_2Cl \cdot Sn^{II}(Pc^{2-})] \cdot C_6H_4Cl_2$  (**4**) were obtained by the following procedure. Fullerene  $C_{60}$  (30 mg, 0.042 mmol) was reduced by a slight excess of sodium fluorenone ketyl (11 mg, 0.054 mmol) in the presence of one equivalent of TBACl (13.4 mg, 0.042 mmol). After one day fullerene salt was obtained, and the solution was filtered into a flask containing 30 mg of  $Sn^{IV}Cl_2Pc$  (0.042 mmol). Phthalocyanine dissolved to form deep blue solution, and after one day one equivalent of the cyclopentadienylmolybdenum tricarbonyl dimer,  $\{CpMo(CO)_3\}_2$ , was added (20.4 mg, 0.084 mmol). The color of the solution changed to deep green within half an hour. This color preserved after one day of stirring. Crystals of **4** were obtained as black plates in a 48% yield. The composition of **4** determined from X-ray diffraction on a single crystal was confirmed by elemental analysis:  $C_{45}H_{25}Cl_3O_2MoN_8Sn$ , 1030.71. Calculated: C, 52.43; H, 2.43; N, 10.87, Cl 10.33; Found: C, 52.15; H, 2.21; N, 10.43; Cl 10.02.

The crystals of  $[\{CpMo(CO)_2\} \cdot \{Sn^{II}(Pc^{2-})\}_2] \cdot 4C_6H_4Cl_2$  (**5**) were obtained by the following procedure. Tin(II) phthalocyanine (26.6 mg, 0.042 mmol) and half equivalent

of the cyclopentadienylmolybdenum tricarbonyl dimer,  $\{\text{CpMo}(\text{CO})_3\}_2$  (10.2 mg, 0.021 mmol), were mixed during one day at 50°C. Phthalocyanine dissolved to form greenish-blue solution. Crystals of **5** were obtained as black rods in a 16% yield. Composition of **5** determined from X-ray diffraction on a single crystal was confirmed by elemental analysis:  $\text{C}_{95}\text{H}_{53}\text{O}_2\text{MoN}_{16}\text{Sn}_2\text{Cl}_8$ ,  $M_r = 2067.45$ : C, 55.19; H, 2.56; N, 10.83, Cl 13.74. Found: C, 54.78; H, 2.28; N, 10.42; Cl 14.12.

Crystals of  $\{\text{Cryptand}(\text{Na}^+)\}[(\text{COD})\text{IrCl}\cdot\text{Sn}^{\text{II}}(\text{Pc}^{\bullet 3-})]^- \cdot 2\text{C}_6\text{H}_4\text{Cl}_2$  (**6**) were prepared by using  $\{\text{Cryptand}(\text{Na}^+)\}[\text{Sn}^{\text{II}}(\text{Pc}^{\bullet 3-})]^-$  salt which was obtained in solution by reduction of tin(II) phthalocyanine (26.6 mg, 0.042 mmol) with 11 mg of sodium fluorenone ketyl (0.056 mmol) in the presence of one equivalent of cryptand (16 mg, 0.042 mmol). Deep blue solution was formed. It was filtered into a flask containing the  $\{(\text{COD})\text{IrCl}\}_2$  dimer (14.1 mg, 0.042 mmol). Deep blue color of the solution was preserved and after one month crystals of **6** were obtained in a 44% yield. Crystals were obtained as black plates, respectively, with a size up to  $0.5 \times 0.5 \times 0.3 \text{ mm}^3$ .  $\text{C}_{70}\text{H}_{72}\text{Cl}_5\text{IrN}_{10}\text{NaO}_6\text{Sn}$ ,  $M_r = 1660.50$ . Calculated: C, 50.63; H, 4.36; N, 8.43; Cl 10.69; Found: C, 49.87; H, 4.05; N, 8.12; Cl 10.54.

Crystals of  $\{\text{Cp}^*_2\text{Co}^+\}[\text{Cp}^*\text{IrI}_2\cdot\text{Sn}^{\text{II}}(\text{Pc}^{\bullet 3-})]^- \cdot 2\text{C}_6\text{H}_4\text{Cl}_2$  (**7**) were prepared by the following procedure: tin(II) phthalocyanine (26.6 mg, 0.042 mmol) and 24.3 mg of the  $(\text{Cp}^*\text{Ir}^{\text{III}}\text{I}_2)_2$  dimer (0.021 mmol) were stirred at 50°C during 24 hours. A deep green solution formed. It was filtered into a flask containing  $\text{Cp}^*_2\text{Co}$  (13.5 mg, 0.042 mmol). The color of the solution changed to deep blue. After one month the crystals of **8** were obtained as black prisms in a 64% yield. Crystals for IR and UV-visible-NIR spectra were tested by X-ray diffraction.

$(\text{TBA}^+)[\text{Fe}(\text{CO})_4\cdot\text{Sn}^{\text{II}}(\text{Pc}^{\bullet 3-})]^-$  (**8**) were prepared by reduction of tin(II) phthalocyanine (26.6 mg, 0.042 mmol) by 11 mg of sodium fluorenone ketyl (0.056 mmol) in the presence of one equivalent of TBABr (13.5 mg, 0.042 mmol) by stirring *o*-

dichlorobenzene solution (17 mL) during 24 hours at 50°C. Deep blue solution was filtered into a flask containing 21 mg Fe<sub>3</sub>(CO)<sub>12</sub> (0.042 mmol). Deep blue color was preserved. The crystals of **8** were formed after one month as black plates in a 72% yield. Crystals for IR and UV-visible-NIR spectra were tested by X-ray diffraction.

Previously crystals of {Cryptand(Na<sup>+</sup>)}[Fe(CO)<sub>4</sub>[Sn<sup>II</sup>(Pc<sup>•3-</sup>)]<sup>-</sup>·1/3C<sub>6</sub>H<sub>4</sub>Cl<sub>2</sub> (**22**) were obtained and studied.<sup>3</sup> They were formed when sodium fluorenone ketyl was used as a reductant. Crystals of {Cryptand(K<sup>+</sup>)}[Fe(CO)<sub>4</sub>·Sn<sup>II</sup>(Pc<sup>•3-</sup>)]·2C<sub>6</sub>H<sub>4</sub>Cl<sub>2</sub> (**9**) were prepared by another method. Tin(II) phthalocyanine (26.6 mg, 0.042 mmol) was reduced by an excess of potassium graphite (20 mg, 0.145 mmol) in the presence of one equivalent of cryptand (16 mg, 0.042 mmol) by stirring the *o*-dichlorobenzene solution (17 mL) during 24 hours at 50°C. Deep blue solution of {Cryptand(Na<sup>+</sup>)}{Sn<sup>II</sup>(Pc<sup>•3-</sup>)}<sup>-</sup> formed. It was filtered into a flask containing 21 mg of Fe<sub>3</sub>(CO)<sub>12</sub> (0.042 mmol). Deep blue color of the solution was preserved. After one month black plates with characteristic copper luster were obtained on the walls of the tube in a 53% yield. These crystals had unit cell parameters different from those of previously studied {Cryptand(Na<sup>+</sup>)}[Fe(CO)<sub>4</sub>[Sn<sup>II</sup>(Pc<sup>•3-</sup>)]<sup>-</sup>·1/3C<sub>6</sub>H<sub>4</sub>Cl<sub>2</sub> (**23**),<sup>3</sup> and correspondingly {Cryptand(K<sup>+</sup>)}[Fe(CO)<sub>4</sub>·Sn<sup>II</sup>(Pc<sup>•3-</sup>)]·2C<sub>6</sub>H<sub>4</sub>Cl<sub>2</sub> (**9**) had different crystal structure and composition. Therefore, even small changes in size of the counter cations can affect crystal structure and packing of these complexes. The compound was obtained as dark black blocks in a 43% yield. Crystals for IR and UV-visible-NIR spectra were tested by X-ray diffraction.

Crystals of {Cryptand(Na<sup>+</sup>)}[(C<sub>6</sub>H<sub>6</sub>)RuCl·{Sn<sup>II</sup>(Pc<sup>•3-</sup>)}<sub>2</sub>]·2.75C<sub>6</sub>H<sub>4</sub>Cl<sub>2</sub> (**10**) were prepared by using {Cryptand(Na<sup>+</sup>)}[Sn<sup>II</sup>(Pc<sup>•3-</sup>)]<sup>-</sup> salt which was generated in *o*-dichlorobenzene (17 mL) by reduction of tin(II) phthalocyanine (26.6 mg, 0.042 mmol) with 11 mg of sodium fluorenone ketyl (0.056 mmol) in the presence of one equivalent of cryptand (16 mg, 0.042 mmol) by stirring during 24 hours at 50°C. Deep blue solution is

formed. It was filtered into a flask containing 10.6 mg of the  $\{(C_6H_6)RuCl_2\}_2$  dimer (0.021 mmol). Deep blue color of the solution was preserved and after one month the crystals of **10** were obtained as black plates in a 48% yield.  $C_{101.5}H_{83}Cl_{5.5}N_{18}NaO_6RuSn_2$ ,  $M_r = 2207.27$ . Calculated: C, 55.23; H, 3.76; N, 11.42; Cl 8.84; Found: C, 54.79; H, 3.48; N, 11.22; Cl 8.71.

Crystals of  $\{Cp^*_2Cr^+\}[Ir_4(CO)_{11}\cdot Sn^{II}(Pc^{\bullet 3-})]^- \cdot C_6H_4Cl_2$  (**11**) were prepared by reduction of half equivalent of  $Sn^{VI}Cl_2Pc$  (15 mg, 0.021 mmol) by one equivalent of  $Cp^*_2Cr$  (13.5 mg, 0.042 mmol) in *o*-dichlorobenzene (17 mL) by stirring during 24 hours at 50°C. Deep blue solution formed. Half equivalent of iridium carbonyl (23.1 mg, 0.021 mmol) was added. Deep blue color of the solution was preserved, and the crystals of **11** were obtained after one month as black bulks in a 51% yield.  $C_{69}H_{50}Cl_2CrIr_4N_8O_{11}Sn$ ,  $M_r = 2177.56$ . Calculated: C, 38.06; H, 2.30; N, 5.14; Cl 3.26; Found: C, 37.58; H, 2.04; N, 5.02; Cl 3.14.

Crystals of  $\{Cp^*_2Cr^+\}[Ir_4(CO)_{11}\cdot Sn^{II}(Nc^{\bullet 3-})]^- \cdot C_6H_4Cl_2$  (**12**) were prepared by reduction of half equivalent of  $Sn^{VI}Cl_2Nc$  (18.9 mg, 0.021 mmol) by one equivalent of  $Cp^*_2Cr$  (13.5 mg, 0.042 mmol) in *o*-dichlorobenzene (17 mL) by stirring during 24 hours at 50°C. Naphthalocyanine dissolved to form deep blue-green solution. Half equivalent of iridium carbonyl (23.1 mg, 0.021 mmol) was added, deep blue-green color was preserved and the crystals of **12** were obtained as black needles after one month in a 38% yield.  $C_{91}H_{62}Cl_4CrIr_4N_8O_{11}Sn$ ,  $M_r = 2524.77$ . Calculated: C, 43.29; H, 2.46; N, 4.44; Cl 5.62; Found: C, 42.81; H, 2.19; N, 4.22; Cl 5.41.

Crystals of  $\{Cp^*_2Cr^+\}[Os_3(CO)_{11}\cdot Sn^{II}(Nc^{\bullet 3-})]^- \cdot 2C_6H_4Cl_2$  (**13**) were prepared by reduction of half equivalent of  $Sn^{VI}Cl_2Nc$  (18.9 mg, 0.021 mmol) by  $Cp^*_2Cr$  (13.5 mg, 0.042 mmol) in *o*-dichlorobenzene (17 mL) by stirring during 24 hours at 50°C. As a result, deep blue-green solution formed. Half equivalent of osmium carbonyl (19.0 mg, 0.021 mmol) was added preserving deep blue-green color of the solution, and the crystals

of **13** were obtained as black blocks after one month in a 49% yield. Crystals for IR and UV-visible-NIR spectra were tested by X-ray diffraction.

#### **References.**

- 1 D. V. Konarev, S. S. Khasanov, E. I. Yudanov and R. N. Lyubovskaya, *Eur. J. Inorg. Chem.* 2011, 816–820.
- 2 D. V. Konarev, S. I. Troyanov, A. V. Kuzmin, Y. Nakano, S. S. Khasanov, A. Otsuka, H. Yamochi, G. Saito and R. N. Lyubovskaya, *Organometallics*, 2015, **34**, 879–89.
- 3 D. V. Konarev, A. V. Kuzmin, Y. Nakano, M. A. Faraonov, S. S. Khasanov, A. Otsuka, H. Yamochi, G. Saito and R. N. Lyubovskaya, *Inorg. Chem.*, 2016, **55**, 1390–1402.



## IR-spectra

**Table S1.** IR spectra of starting compounds and complexes **2 – 5**.

| Comp.                           | Sn <sup>II</sup> (Pc <sup>2-</sup> )                                                                                                                                   | {Cp*IrI <sub>2</sub> } <sub>2</sub>                                                                                                                             | [Cp*IrI <sub>2</sub> ·<br>Sn <sup>II</sup> (Pc <sup>2-</sup> )]<br>·C <sub>6</sub> H <sub>4</sub> Cl <sub>2</sub><br>( <b>2</b> )                   | CpV(CO) <sub>4</sub>                                                                          | [CpV(CO) <sub>3</sub> ·<br>Sn <sup>II</sup> (Pc <sup>2-</sup> )]<br>·C <sub>6</sub> H <sub>4</sub> Cl <sub>2</sub> ( <b>3</b> )                          | {CpMo(CO) <sub>3</sub> } <sub>2</sub>                                                                                              | [CpMo <sup>II</sup> (CO) <sub>2</sub> Cl<br>·Sn <sup>II</sup> (Pc <sup>2-</sup> )] <sub>2</sub> ·<br>C <sub>6</sub> H <sub>4</sub> Cl <sub>2</sub> ( <b>4</b> ) | [CpMo(CO) <sub>2</sub> ·<br>Sn <sup>II</sup> (Pc <sup>2-</sup> )] <sub>2</sub> ·<br>4C <sub>6</sub> H <sub>4</sub> Cl <sub>2</sub> ( <b>5</b> )    |
|---------------------------------|------------------------------------------------------------------------------------------------------------------------------------------------------------------------|-----------------------------------------------------------------------------------------------------------------------------------------------------------------|-----------------------------------------------------------------------------------------------------------------------------------------------------|-----------------------------------------------------------------------------------------------|----------------------------------------------------------------------------------------------------------------------------------------------------------|------------------------------------------------------------------------------------------------------------------------------------|-----------------------------------------------------------------------------------------------------------------------------------------------------------------|----------------------------------------------------------------------------------------------------------------------------------------------------|
| Tin<br>phthalocyanine           | 435w<br>498w<br>627w<br>725m<br>745m<br>768m<br>819w<br>872w<br>887m<br>948w<br>1059s<br>1072s<br>1114s<br>1156w<br>1283m<br>1329s<br>1407w<br>1454w<br>1486s<br>3049w | -                                                                                                                                                               | 436w<br>504w<br>630w<br>727s<br>750m*<br>777w<br>825w<br>-<br>892m<br>-<br>-<br>1077m<br>1117m*<br>-<br>1287w<br>1334s<br>-<br>1455w*<br>1497w<br>- | -                                                                                             | -<br>507w*<br>-<br>724m<br>751w*<br>775w<br>826w*<br>874w<br>892w<br>956w<br>-<br>1078m<br>1121m*<br>1163w<br>1290w<br>1334m<br>1418w<br>1459w*<br>1478w | -                                                                                                                                  | 435w<br>502w*<br>-<br>727s<br>750m*<br>773w<br>811w<br>-<br>891m<br>-<br>-<br>1075m<br>1119s*<br>1164w<br>1289w<br>1333s<br>-<br>1456w*<br>1491w<br>-           | -<br>499w*<br>629w<br>726m<br>748w*<br>763w<br>818m*<br>-<br>891m<br>-<br>-<br>1079s<br>1117s*<br>1165w<br>1289w<br>1331m<br>-<br>1463w*<br>-<br>- |
| Transition<br>metal<br>fragment | -                                                                                                                                                                      | Cp*IrI <sub>2</sub><br>423w<br>534w<br>607w<br>951w<br>1021s<br>1076w<br>1153w<br>1356s<br>1370m<br>1381s<br>1417w<br>1459s<br>1618w<br>2901w<br>2960w<br>2979w | Cp*IrI <sub>2</sub><br>-<br>-<br>-<br>-<br>1377w<br>-<br>-<br>1418w<br>-<br>-<br>-<br>-<br>-<br>-<br>-                                              | CpV(CO) <sub>4</sub><br>432w<br>498m<br>596m<br>625w<br>837m<br>1013w<br>CO<br>1895s<br>2015m | CpV(CO) <sub>4</sub><br>-<br>507w*<br>-<br>-<br>826w*<br>-<br>CO<br>1824s<br>1832s<br>1861w<br>1974m<br>1985s<br>2019s<br>2036s<br>2075s                 | 417w<br>451m<br>477w<br>501m<br>547m<br>587m<br>824s<br>1016w<br>1264w<br>1419w<br>1427w<br>CO<br>1886s<br>1899s<br>1953s<br>3115w | CpMo(CO) <sub>2</sub><br>-<br>-<br>480w<br>502w*<br>543w<br>-<br>823w<br>-<br>-<br>1418w<br>-<br>-<br>1862s<br>1956s<br>-<br>-                                  | CpMo(CO) <sub>2</sub><br>-<br>-<br>-<br>499w*<br>553m<br>-<br>-<br>818m*<br>-<br>1261w<br>1417w<br>-<br>-<br>1867m<br>1930w<br>-<br>-              |
| Solvent                         | -                                                                                                                                                                      | -                                                                                                                                                               | C <sub>6</sub> H <sub>4</sub> Cl <sub>2</sub><br>658w<br>750m*<br>1033w<br>1117m*<br>1455w*                                                         | -                                                                                             | C <sub>6</sub> H <sub>4</sub> Cl <sub>2</sub><br>-<br>751w*<br>-<br>1121m*<br>1459w*                                                                     | -                                                                                                                                  | C <sub>6</sub> H <sub>4</sub> Cl <sub>2</sub><br>658w<br>750m*<br>1036w<br>1119s0<br>1456w**                                                                    | C <sub>6</sub> H <sub>4</sub> Cl <sub>2</sub><br>-<br>748w*<br>-<br>1117s*<br>1463w*                                                               |

\* - bands are coincided; w – weak, m –middle and s – strong intensity

**Table S2.** IR spectra of starting compounds and complexes **6** and **7**

| Comp.                     | Sn <sup>II</sup> (Pc <sup>3-</sup> )<br>in {cryptand(Na <sup>+</sup> )}<br>[Sn <sup>II</sup> (Pc <sup>3-</sup> )] <sup>-</sup><br>·C <sub>6</sub> H <sub>4</sub> Cl <sub>2</sub>    | Cryptand                                                                                                                                         | {IrCl<br>(COD)} <sub>2</sub>                                                                                             | {Cryptand(Na <sup>+</sup> )}<br>[(COD)Ir <sup>I</sup> Cl·<br>Sn <sup>II</sup> (Pc <sup>3-</sup> )] <sup>-</sup> ·<br>2C <sub>6</sub> H <sub>4</sub> Cl <sub>2</sub> ( <b>6</b> ) | M-fragment                                                                                                                                                   | {Cp* <sub>2</sub> Co <sup>+</sup> }{[Cp*IrI <sub>2</sub> ][Sn <sup>II</sup><br>(Pc <sup>3-</sup> )]}·2C <sub>6</sub> H <sub>4</sub> Cl <sub>2</sub> ( <b>7</b> )    |
|---------------------------|-------------------------------------------------------------------------------------------------------------------------------------------------------------------------------------|--------------------------------------------------------------------------------------------------------------------------------------------------|--------------------------------------------------------------------------------------------------------------------------|----------------------------------------------------------------------------------------------------------------------------------------------------------------------------------|--------------------------------------------------------------------------------------------------------------------------------------------------------------|---------------------------------------------------------------------------------------------------------------------------------------------------------------------|
| Tin<br>Phthalocyanine     | 499w<br>716s<br>740m<br>766m<br>817w<br>927w<br>1003w<br>1051m<br>1103s<br>1112s<br>1163w<br>1288w<br>1298w<br>1325w<br>1356w<br>1417w<br>1457m<br>2865w<br>2914w<br>2967w<br>3050w | -                                                                                                                                                | -                                                                                                                        | 496w*<br>714m<br>748m*<br>766w<br>822w<br>928w*<br>1006w*<br>1048m<br>1102s*<br>1113s*<br>1165w*<br>-<br>1299m*<br>1327m*<br>1354w*<br>1420w<br>1456m*<br>2869w<br>-<br>-<br>-   |                                                                                                                                                              | -<br>711m*<br>748w*<br>765w<br>824w<br>-<br>-<br>1044m*<br>1086m*<br>1113m*<br>1163w*<br>1288w<br>-<br>1328w*<br>-<br>1420m*<br>1455w*<br>-<br>2927w<br>2972w*<br>- |
| Cation <sup>+</sup>       | -                                                                                                                                                                                   | 476w<br>735m<br>922m<br>948w<br>982m<br>1038w<br>1071m<br>1100s<br>1127s<br>1295m<br>1329m<br>1360s<br>1446m<br>1462m<br>1490w<br>2877w<br>2943w |                                                                                                                          | Cryptand(Na <sup>+</sup> )<br>468w<br>-<br>928w*<br>950w<br>-<br>1038w*<br>1088s*<br>1102s*<br>1113s*<br>1299m*<br>1327m*<br>1354w*<br>1433w<br>-<br>1498w<br>2879w*<br>-        | Cp* <sub>2</sub> Co <sup>+</sup><br>445w<br>717w<br>1024s<br>1078m<br>1260w<br>1314m<br>1376s<br>1425m<br>1452m<br>1474m<br>1612s<br>2850w<br>2904w<br>2960w | Cp* <sub>2</sub> Co <sup>+</sup><br>442s<br>711m*<br>-<br>1086m*<br>1264w<br>1328w*<br>-<br>1420m*<br>1455w*<br>1563w*<br>-<br>-<br>2899w*<br>2972w*                |
| Transition metal fragment | -                                                                                                                                                                                   | -                                                                                                                                                | 412s<br>496s<br>507m<br>530s<br>783w<br>806w<br>831m<br>900s<br>967m<br>978m<br>999m<br>1073w<br>1154w<br>1321w<br>2877w | IrCl(COD)<br>-<br>496w*<br>-<br>-<br>-<br>-<br>-<br>-<br>-<br>-<br>-<br>1006w*<br>1088s*<br>1165w*<br>2879w*                                                                     | Cp*IrI <sub>2</sub><br>423w<br>534w<br>951w<br>1021s<br>1076w<br>1153w<br>1356s<br>1370m<br>1381s<br>1417w<br>1459s<br>1618w<br>2901w<br>2960w<br>2979w      | Cp*IrI <sub>2</sub><br>-<br>-<br>-<br>-<br>1086m*<br>1163w*<br>-<br>1378w<br>-<br>1420m*<br>1563w*<br>1630w<br>2899w*<br>-<br>2972w*                                |
| Solvent                   | -                                                                                                                                                                                   | -                                                                                                                                                | -                                                                                                                        | C <sub>6</sub> H <sub>4</sub> Cl <sub>2</sub><br>748m*<br>1038w*<br>1113s*<br>1456m*                                                                                             |                                                                                                                                                              | C <sub>6</sub> H <sub>4</sub> Cl <sub>2</sub><br>748w*<br>1044m*<br>1113m*<br>1563w*                                                                                |

\* - bands are coincided; w – weak, m –middle and s – strong intensity

**Table S3.** IR spectra of starting compounds and complexes **8-10**

| Comp.                           | Sn <sup>II</sup> (Pc <sup>3-</sup> )<br>in {cryptand(Na <sup>+</sup> )}<br>[Sn <sup>II</sup> (Pc <sup>3-</sup> )] <sup>•-</sup><br>·C <sub>6</sub> H <sub>4</sub> Cl <sub>2</sub>                                                     | TBA <sup>+</sup>                                                                                                                                                              | Fe <sub>3</sub> (CO) <sub>12</sub>                                      | (TBA <sup>+</sup> )<br>{[Fe(CO) <sub>4</sub> ·<br>Sn <sup>II</sup> (Pc <sup>3-</sup> )]}<br>(8)                                                                                                                     | {Crypt(Na <sup>+</sup> )<br>[Fe(CO) <sub>4</sub> ·<br>Sn <sup>II</sup> (Pc <sup>3-</sup> )]}·<br>2C <sub>6</sub> H <sub>4</sub> Cl <sub>2</sub> (9)                                                                                      | (C <sub>6</sub> H <sub>6</sub> )<br>RuCl <sub>2</sub>                                                                                                                          | {Cryptand(Na <sup>+</sup> )<br>[(C <sub>6</sub> H <sub>6</sub> )RuCl <sub>2</sub> ·<br>{Sn <sup>II</sup> (Pc <sup>3-</sup> )} <sub>2</sub> ]<br>·C <sub>6</sub> H <sub>4</sub> Cl <sub>2</sub> (10)                                        |
|---------------------------------|---------------------------------------------------------------------------------------------------------------------------------------------------------------------------------------------------------------------------------------|-------------------------------------------------------------------------------------------------------------------------------------------------------------------------------|-------------------------------------------------------------------------|---------------------------------------------------------------------------------------------------------------------------------------------------------------------------------------------------------------------|------------------------------------------------------------------------------------------------------------------------------------------------------------------------------------------------------------------------------------------|--------------------------------------------------------------------------------------------------------------------------------------------------------------------------------|--------------------------------------------------------------------------------------------------------------------------------------------------------------------------------------------------------------------------------------------|
| Tin<br>Phthalocyanine           | 499w<br>628w<br>657w<br>716s<br>740m<br>766m<br>817w<br>894w<br>927w<br>941w<br>1003w<br>1051m<br>1103s<br>1112s<br>1163w<br>1288w<br>1298w<br>1325w<br>1356w<br>1417w<br>1457m<br>1601w<br>2817w<br>2865w<br>2914w<br>2967w<br>3050w | -                                                                                                                                                                             | -                                                                       | 502w<br>627m<br>-<br>710w<br>747w*<br>764w<br>829w<br>890w*<br>-<br>947w<br>1001w*<br>-<br>-<br>1116m*<br>1166w*<br>1288w<br>-<br>1330m<br>-<br>1416w<br>1460w*<br>1603w<br>-<br>2874w*<br>2930w<br>2961w*<br>3053w | 498w<br>626m<br>-<br>712w<br>748w*<br>768w<br>820w<br>892w<br>927w*<br>940w*<br>1004w<br>1054w<br>1101m*<br>1116s*<br>1166w<br>-<br>1300w*<br>1330w*<br>1354w*<br>1421w<br>1464w*<br>1602w<br>2821w<br>2866w*<br>2906w<br>2961w<br>3051w | -                                                                                                                                                                              | 498w<br>631w<br>657w*<br>713s<br>746m*<br>764w<br>822w<br>884w<br>928w*<br>942w*<br>1001w*<br>1053w*<br>1102s*<br>1115s*<br>1165w<br>-<br>1300m*<br>1327m*<br>1356w*<br>1419m<br>1456m*<br>1601w<br>2816w<br>2866w*<br>-<br>2967w<br>3054w |
| TBA <sup>+</sup>                | -                                                                                                                                                                                                                                     | TBA <sup>+</sup><br>738s<br>883s<br>896s<br>922s<br>992s<br>1031m<br>1059m<br>1069m<br>1110s<br>1166s<br>1240m<br>1365m<br>1379m<br>1455s<br>1464s<br>1474s<br>2873w<br>2959w | -                                                                       | TBA <sup>+</sup><br>747w*<br>-<br>890w*<br>1001w*<br>-<br>-<br>1080w<br>1116m*<br>1166w*<br>-<br>-<br>1380w<br>-<br>1460w*<br>-<br>2874w*<br>2961w*                                                                 | Cryptand(Na <sup>+</sup> )<br>-<br>731w<br>927w*<br>940w*<br>1037w*<br>1089m<br>1101m*<br>1116s*<br>-<br>1300w*<br>1330w*<br>1354w*<br>1436w<br>1464w*<br>1501w<br>2866w*                                                                | Cryptand(Na <sup>+</sup> )<br>466w<br>-<br>746m*<br>928w*<br>942w*<br>1034w*<br>1088s<br>1102s*<br>1115s*<br>-<br>1300m*<br>1327m*<br>1356w*<br>-<br>1456m*<br>1498w<br>2866w* |                                                                                                                                                                                                                                            |
| Transition<br>metal<br>fragment | -                                                                                                                                                                                                                                     | -                                                                                                                                                                             | 415w<br>573s<br>596s<br>1044w<br>CO<br>1830s<br>1859m<br>2024s<br>2104m | -<br>568w<br>-<br>-<br>CO<br>1896s<br>1928w<br>2015m<br>-                                                                                                                                                           | -<br>568w<br>-<br>1037w*<br>CO<br>1908s<br>1933s<br>2014s<br>-                                                                                                                                                                           | 444m<br>618w<br>841s<br>900w<br>954w<br>974m<br>1015w<br>1149w<br>1431s<br>3033w<br>3076w                                                                                      | 438w<br>-<br>-<br>-<br>942w*<br>-<br>1001w*<br>-<br>1434m<br>-<br>-                                                                                                                                                                        |

\* - bands are coincided; w – weak, m –middle and s – strong intensity

**Table S4.** IR spectra of starting compounds and complex **11-13**.

| Components                                    | Sn <sup>II</sup> (Pc <sup>•3-</sup> )                                                                                                                                                                                | Cp <sup>•2</sup> Cr                                                                                             | Ir <sub>4</sub> (CO) <sub>12</sub>                                                               | {Cp <sup>•2</sup> Cr <sup>+</sup> }<br>{[Ir <sub>4</sub> (CO) <sub>11</sub> ·<br>Sn <sup>II</sup> (Pc <sup>•3-</sup> )]<br>·C <sub>6</sub> H <sub>4</sub> Cl <sub>2</sub><br>(11)}        | Sn <sup>II</sup> (Nc <sup>2-</sup> )                                                                                                                                                                                | {Cp <sup>•2</sup> Cr <sup>+</sup> }<br>[Ir <sub>4</sub> (CO) <sub>11</sub> ·<br>Sn <sup>II</sup> (Nc <sup>•3-</sup> )].<br>C <sub>6</sub> H <sub>4</sub> Cl <sub>2</sub> (12) | Os <sub>3</sub> (CO) <sub>12</sub>                                                                                                                              | {Cp <sup>•2</sup> Cr <sup>+</sup> }<br>[Os <sub>3</sub> (CO) <sub>11</sub> ·<br>Sn <sup>II</sup> (Nc <sup>•3-</sup> )].<br>2C <sub>6</sub> H <sub>4</sub> Cl <sub>2</sub><br>(13) |
|-----------------------------------------------|----------------------------------------------------------------------------------------------------------------------------------------------------------------------------------------------------------------------|-----------------------------------------------------------------------------------------------------------------|--------------------------------------------------------------------------------------------------|-------------------------------------------------------------------------------------------------------------------------------------------------------------------------------------------|---------------------------------------------------------------------------------------------------------------------------------------------------------------------------------------------------------------------|-------------------------------------------------------------------------------------------------------------------------------------------------------------------------------|-----------------------------------------------------------------------------------------------------------------------------------------------------------------|-----------------------------------------------------------------------------------------------------------------------------------------------------------------------------------|
| Tin phthalocyanine                            | 499w<br>657w<br>716s<br>740m<br>766m<br>817w<br>894w<br>927w<br>941w<br>1003w<br>1051m<br>1103s<br>1112s<br>1163w<br>1288w<br>1298w<br>1325w<br>1356w<br>1417w<br>1457m<br>1601w<br>2865w<br>2914w<br>2967w<br>3050w | -                                                                                                               | -                                                                                                | -<br>659w*<br>714s<br>748m*<br>766m<br>827w<br>886w<br>-<br>949w<br>999w<br>-<br>-<br>1114s*<br>1166m<br>-<br>1306w<br>1328m<br>-<br>1421m*<br>1456m<br>1603w<br>-<br>2921w<br>-<br>3056w | 467m<br>486w<br>565w<br>615w<br>709m<br>717w<br>727w<br>748m<br>808w<br>884w<br>1013m<br>1025m<br>1079s<br>1122w<br>1147w<br>1261w<br>1318w<br>1336w<br>1359m<br>1469w<br>1504w<br>1624w<br>2859w<br>2926w<br>2957w | 472w*<br>-<br>-<br>-<br>-<br>714w<br>-<br>756w*<br>-<br>889w<br>-<br>-<br>1090m<br>-<br>-<br>1261w*<br>1323w<br>1341m<br>1356m<br>-<br>-<br>-<br>-<br>-<br>-<br>-             | -                                                                                                                                                               | 464w<br>-<br>565w*<br>-<br>712w<br>-<br>-<br>750w*<br>800w*<br>884w<br>-<br>-<br>1020w*<br>1091m<br>-<br>1159w<br>1263w*<br>-<br>1340m<br>1355m<br>-<br>-<br>-<br>-<br>-          |
| Cation <sup>+</sup>                           | -                                                                                                                                                                                                                    | Cp <sup>•2</sup> Cr <sup>+</sup><br>587w<br>800w<br>1019m<br>1067w<br>1262w<br>1375m<br>1417w<br>1446w<br>2955w | -                                                                                                | Cp <sup>•2</sup> Cr <sup>+</sup><br>-<br>799w*<br>1022w*<br>1084m<br>1252s*<br>1384m<br>1421m*<br>1434w<br>-                                                                              | -                                                                                                                                                                                                                   | Cp <sup>•2</sup> Cr <sup>+</sup><br>-<br>-<br>-<br>-<br>1261w*<br>-<br>-<br>-<br>-<br>-                                                                                       | -                                                                                                                                                               | Cp <sup>•2</sup> Cr <sup>+</sup><br>586m*<br>800w*<br>1020w*<br>-<br>1263w*<br>-<br>-<br>1455w*<br>-                                                                              |
| Transition metal fragment                     | -                                                                                                                                                                                                                    | -                                                                                                               | 440m<br>471w<br>498s<br>529m<br>805w<br>1022w<br>1104w<br>1260w<br>CO<br>2024s<br>2059s<br>2087s | Ir <sub>4</sub> (CO) <sub>12</sub><br>438w<br>474w<br>-<br>525m<br>799w*<br>1022w*<br>-<br>1252s*<br>CO<br>1816s<br>1839s<br>1996s<br>2007s<br>2035s<br>2045s<br>2074s                    | -                                                                                                                                                                                                                   | Ir <sub>4</sub> (CO) <sub>12</sub><br>-<br>1472w*<br>-<br>525w<br>-<br>-<br>-<br>1261w*<br>CO<br>1817m<br>2001s<br>2043s<br>2078w                                             | Os <sub>3</sub> (CO) <sub>12</sub><br>410w<br>431w<br>463w<br>496w<br>563w<br>584m<br>604m<br>CO<br>1984s<br>1994s<br>2016s<br>2028s<br>2040s<br>2060s<br>2068s | Os <sub>3</sub> (CO) <sub>12</sub><br>412w<br>-<br>-<br>496w<br>565w*<br>586m*<br>605m<br>CO<br>1986s<br>1994s<br>2016s<br>2039s<br>2068s<br>-<br>-                               |
| C <sub>6</sub> H <sub>4</sub> Cl <sub>2</sub> | -                                                                                                                                                                                                                    | -                                                                                                               | -                                                                                                | 659w*<br>748m*<br>1036w<br>1114s*<br>1462w                                                                                                                                                | -                                                                                                                                                                                                                   | -<br>756w*<br>-<br>-<br>-                                                                                                                                                     | -                                                                                                                                                               | -                                                                                                                                                                                 |

\* - bands are coincided; w – weak, m –middle and s – strong intensity

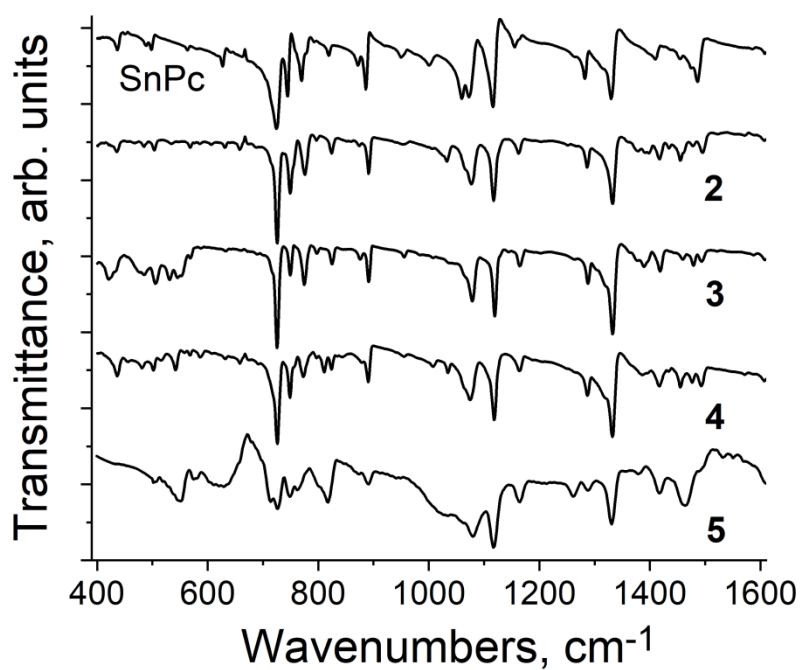

**Figure S1.** IR spectra of pristine neutral Sn<sup>II</sup>Pc and compounds **1** - **5** in KBr pellets prepared in anaerobic conditions

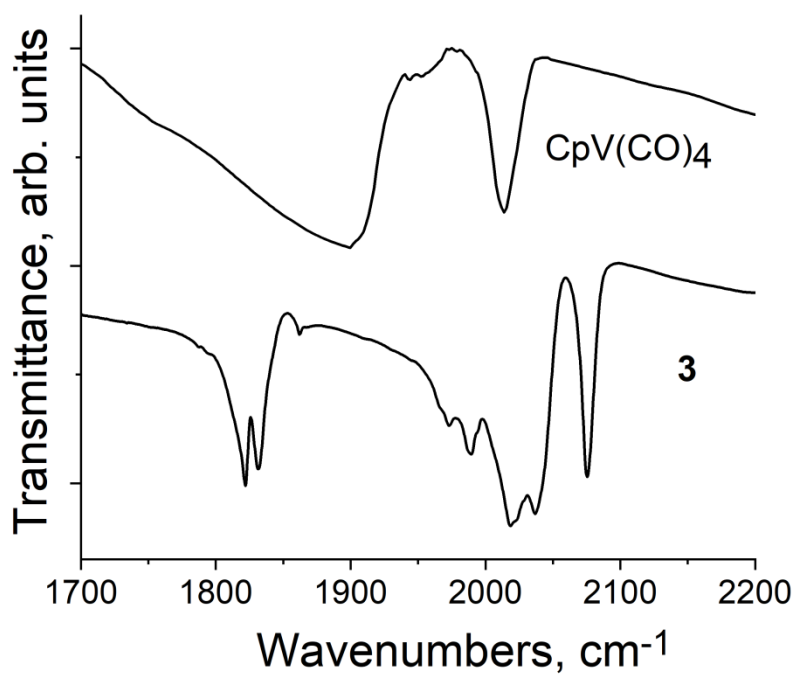

**Figure S2.** IR spectra of starting transition metal complex and salt **3** in 1700 – 2200 cm<sup>-1</sup> range in KBr pellets prepared in anaerobic conditions

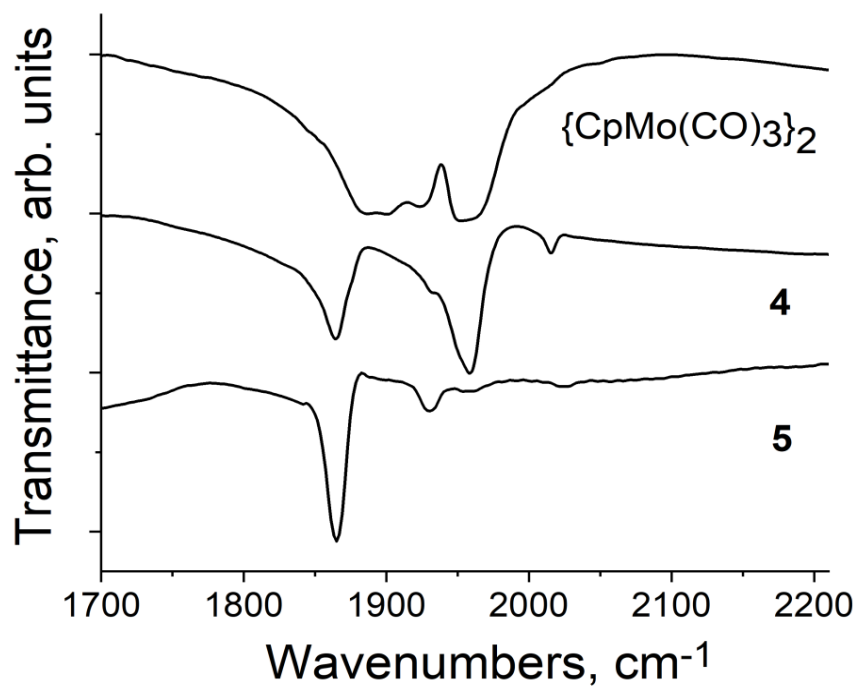

**Figure S3.** IR spectra of starting transition metal complex and salts **4** and **5** in 1700 – 2200 cm<sup>-1</sup> range in KBr pellets prepared in anaerobic conditions.

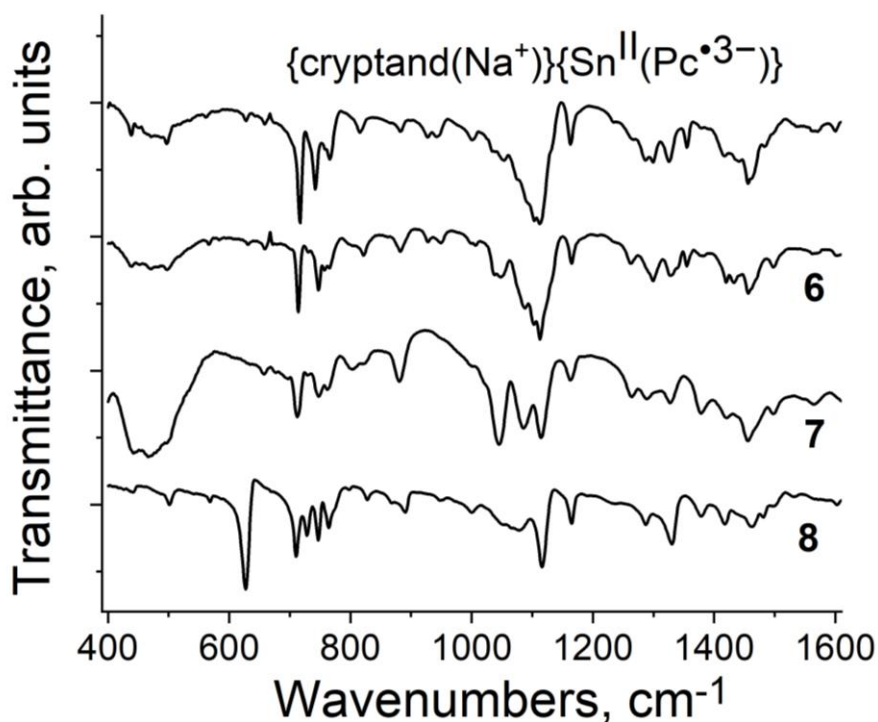

**Figure S4.** IR spectra of radical anion salt  $\{\text{cryptand}(\text{Na}^+)\}\{\text{Sn}^{\text{II}}(\text{Pc}^{\bullet 3-})\} \cdot \text{C}_6\text{H}_4\text{Cl}_2$  and salts **6** - **8** in KBr pellets prepared in anaerobic condition.

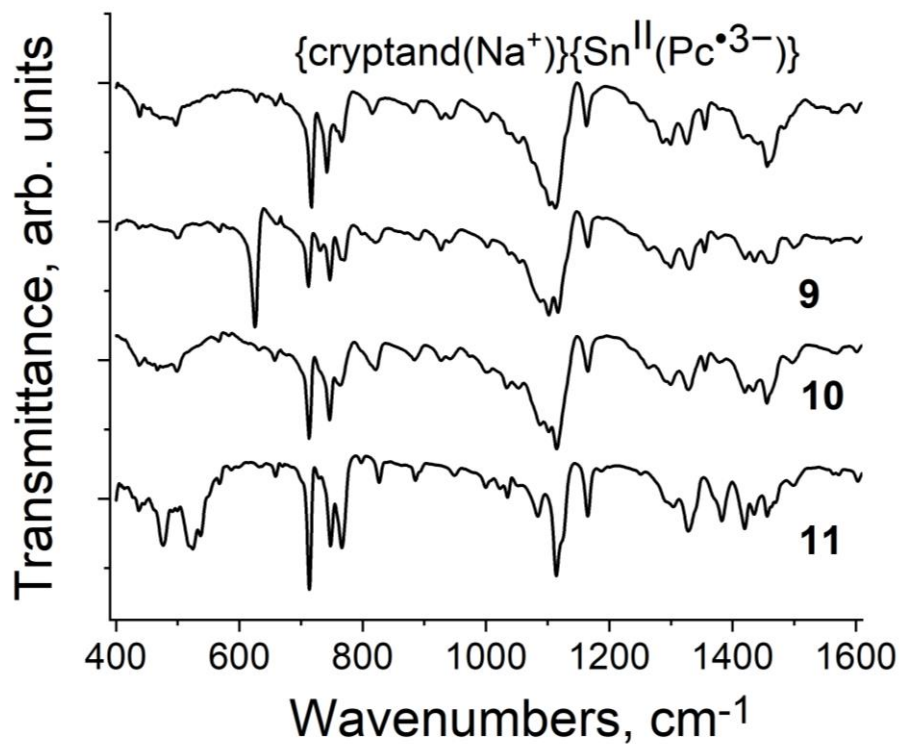

**Figure S5.** IR spectra of radical anion salt  $\{\text{cryptand}(\text{Na}^+)\}\{\text{Sn}^{\text{II}}(\text{Pc}^{\bullet 3-})\}^{\bullet -} \cdot \text{C}_6\text{H}_4\text{Cl}_2$  and salts **9** - **11** in KBr pellets prepared in anaerobic condition.

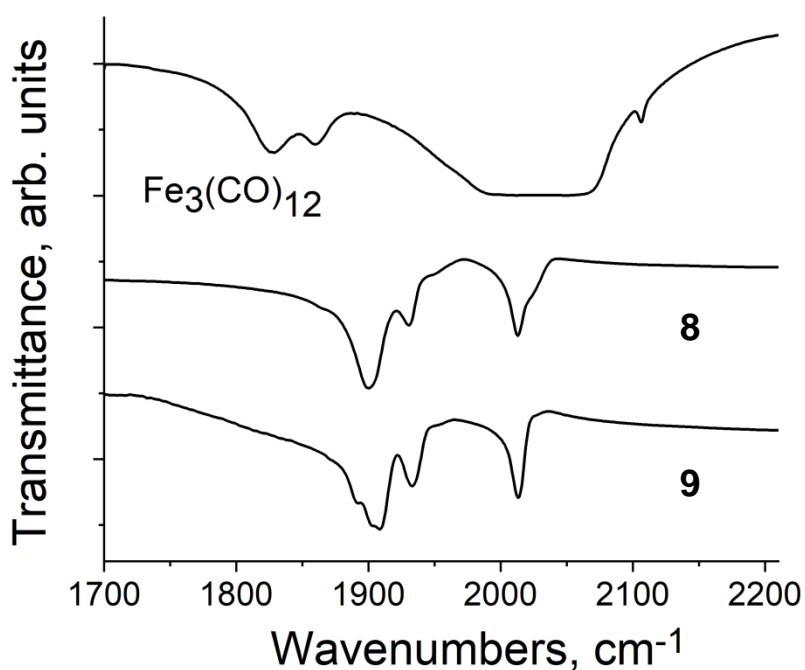

**Figure S6.** IR spectra of starting transition metal complex  $\text{Fe}_3(\text{CO})_{12}$  and compounds **8** and **9** in 1700 – 2210 cm<sup>-1</sup> range in KBr pellets prepared in anaerobic conditions.

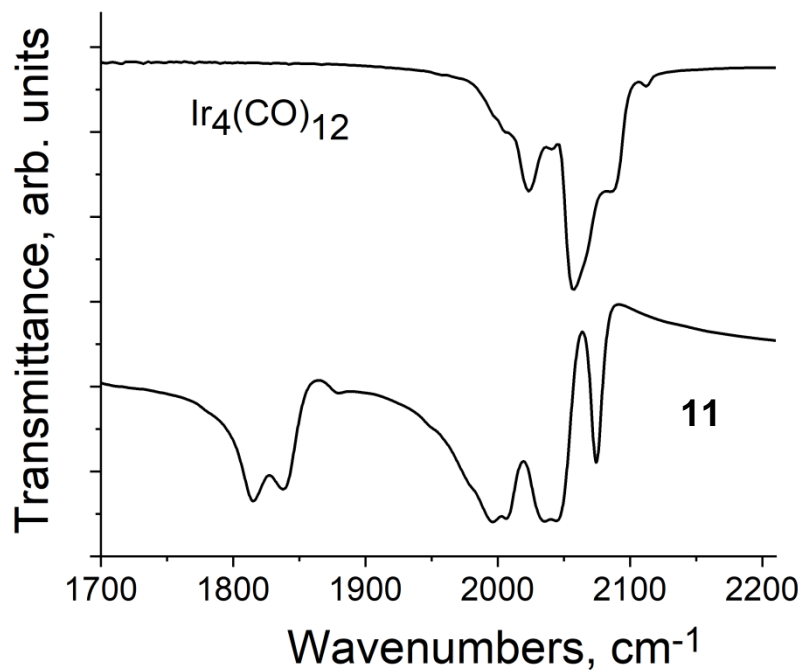

**Figure S7.** IR spectra of starting transition metal complex and salt **11** in 1700 – 2210 cm<sup>-1</sup> range in KBr pellets prepared in anaerobic conditions.

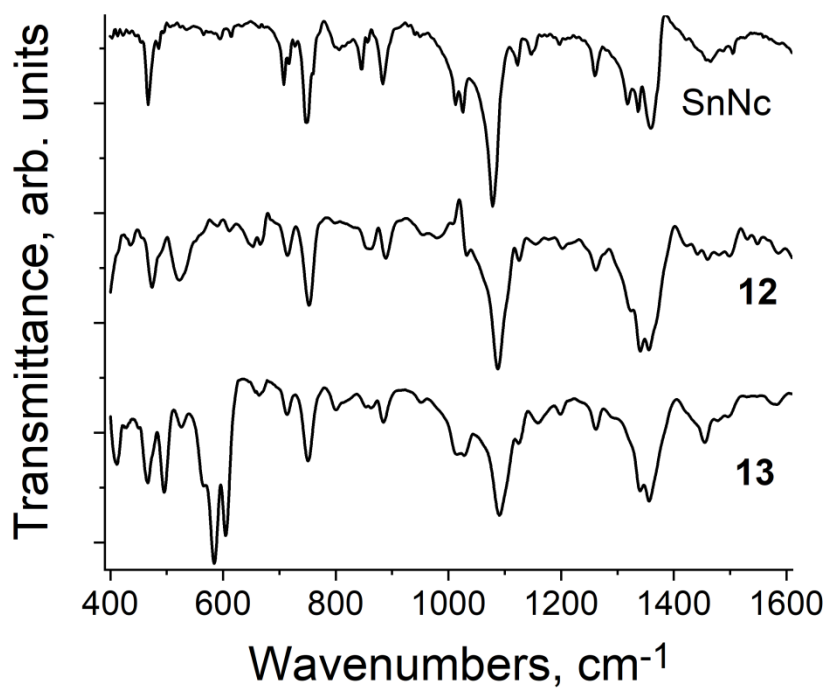

**Figure S8.** IR spectra of pristine neutral SnNc and compounds **12** and **13** in KBr pellets prepared in anaerobic condition.



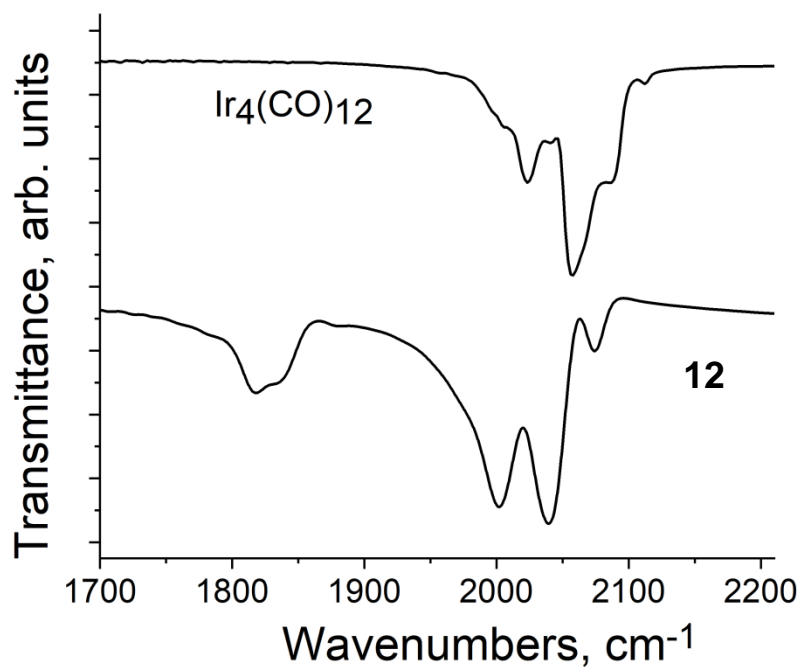

**Figure S9.** IR spectra of starting transition metal complex Ir<sub>4</sub>(CO)<sub>12</sub> and compound **12** in 1700 – 2200 cm<sup>-1</sup> range in KBr pellets prepared in anaerobic conditions.

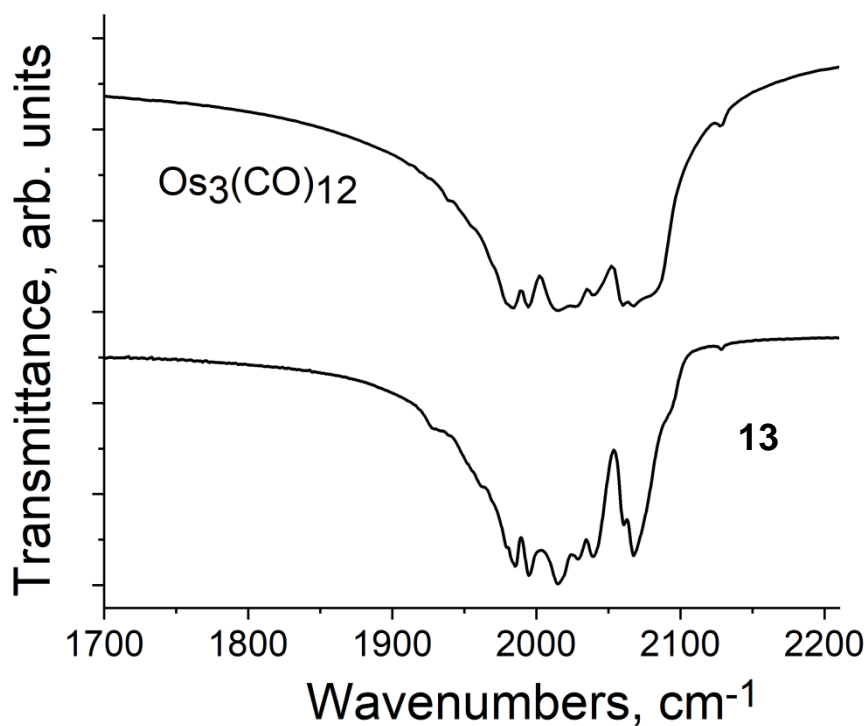

**Figure S10.** IR spectra of starting transition metal carbonyl Os<sub>3</sub>(CO)<sub>12</sub> and compound **13** in 1700 – 2210 cm<sup>-1</sup> range in KBr pellets prepared in anaerobic conditions.

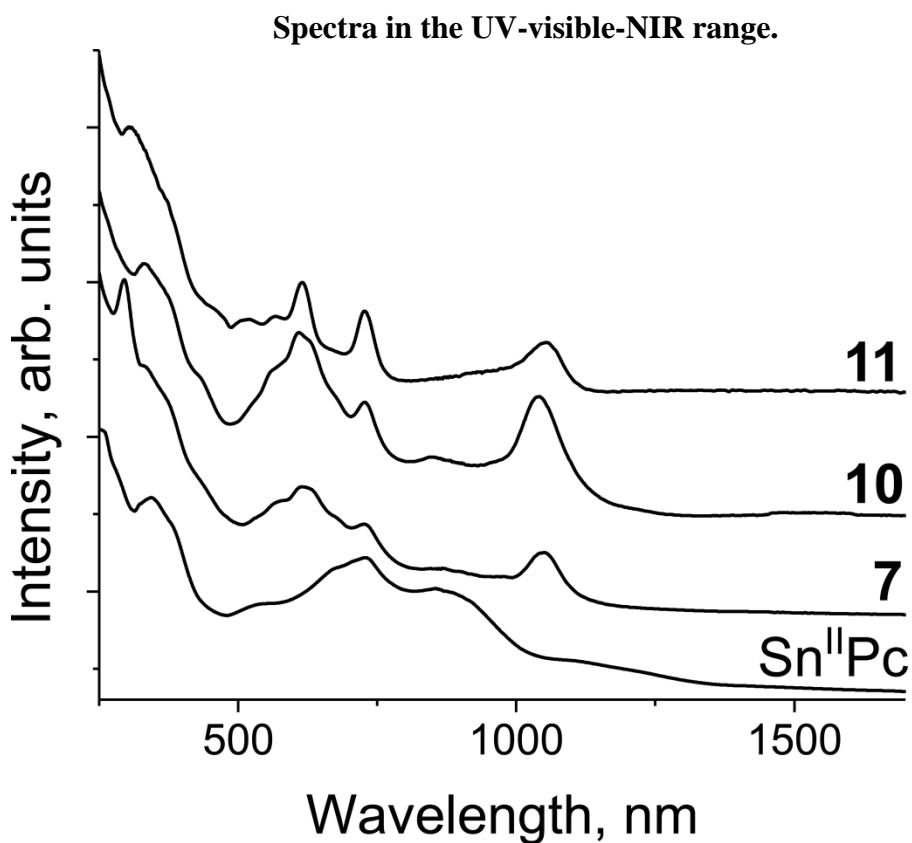

**Fig. S11a.** UV-visible-NIR spectra of coordination complexes of transition metals with the  $\{\text{Sn}^{\text{II}}(\text{Pc}^{\bullet 3-})\}^-$  radical anions in **8**, **11-12** measured in KBr pellets prepared in anaerobic conditions.

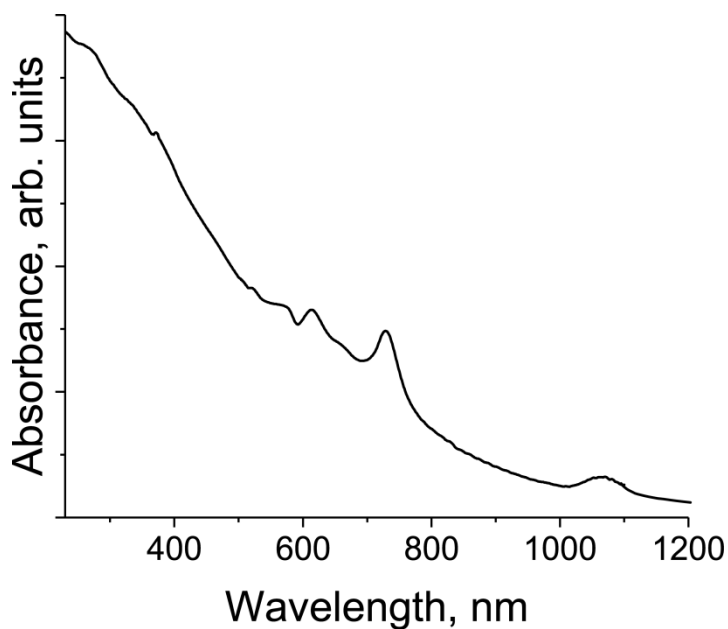

**Fig. S11b.** UV-visible-NIR spectra of coordination complex **5** measured in KBr pellets prepared in anaerobic conditions.

### Crystal structures.

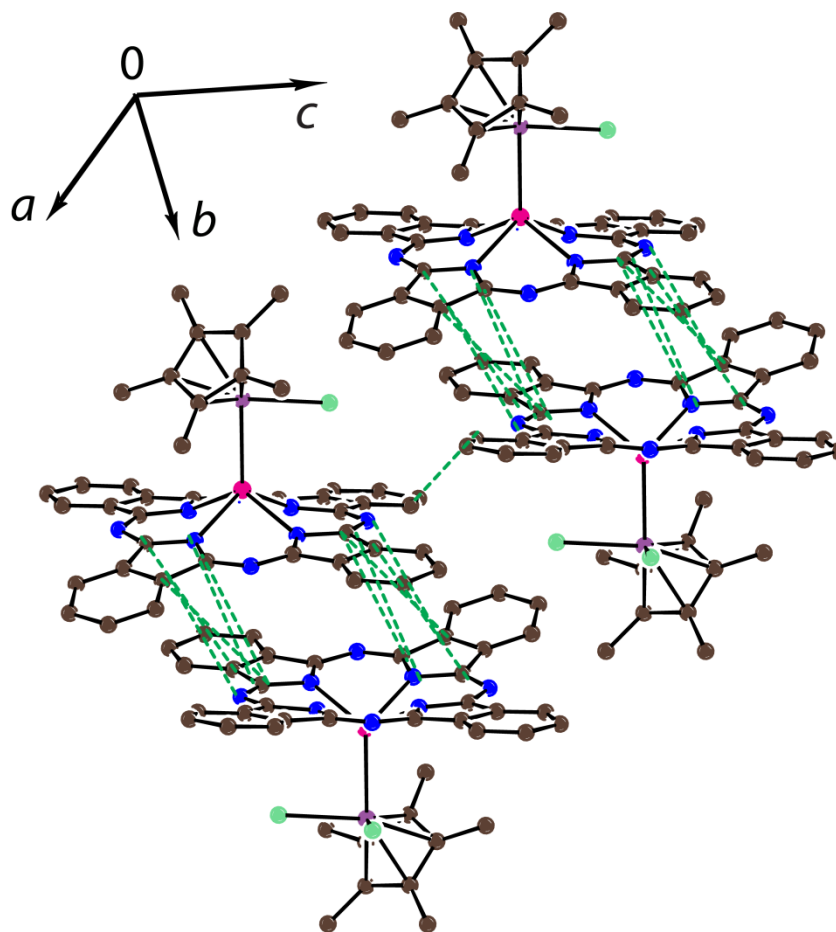

**Figure S12a.** Crystal structure of  $[\text{Cp}^*\text{IrCl}_2 \cdot \text{Sn}^{\text{II}}(\text{Pc}^{2-})]$  (**1**). Ortep drawing with equivalent isotropic atomic displacement parameters is shown.

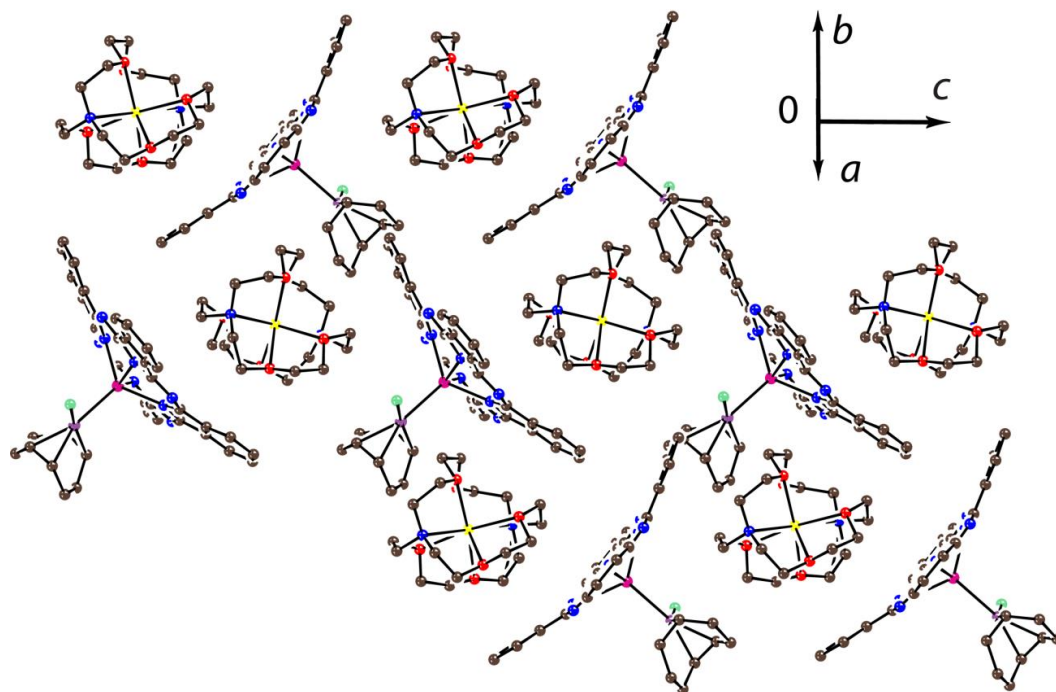

**Figure S12b.** Crystal structure of  $\{\text{Cryptand}(\text{Na}^+)\}[(\text{COD})\text{IrCl}\cdot\text{Sn}^{\text{II}}(\text{Pc}^{*3-})]^- \cdot 2\text{C}_6\text{H}_4\text{Cl}_2$  (**6**). Solvent  $\text{C}_6\text{H}_4\text{Cl}_2$  molecules are not depicted. Ortep drawing with equivalent isotropic atomic displacement parameters is shown.

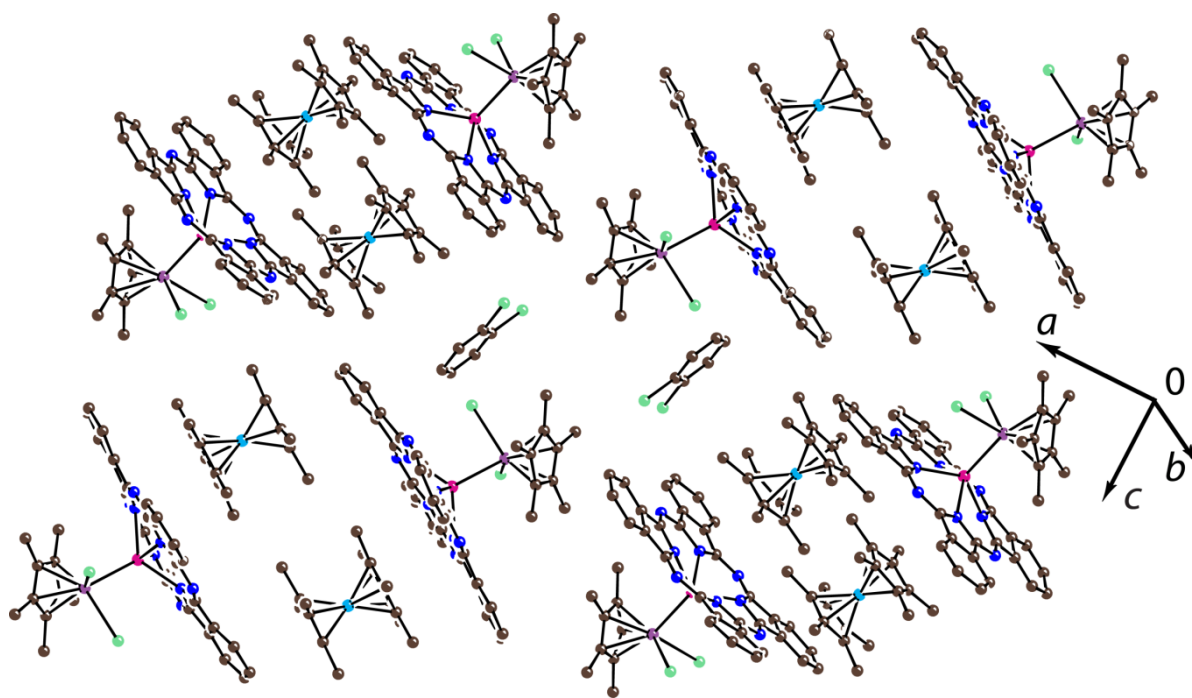

**Figure S13.** Crystal structure of  $\{\text{Cp}^*_2\text{Co}^+\}[\text{Cp}^*\text{IrI}_2\cdot\text{Sn}^{\text{II}}(\text{Pc}^{*3-})]^- \cdot 2\text{C}_6\text{H}_4\text{Cl}_2$  (**7**). Ortep drawing with equivalent isotropic atomic displacement parameters is shown.

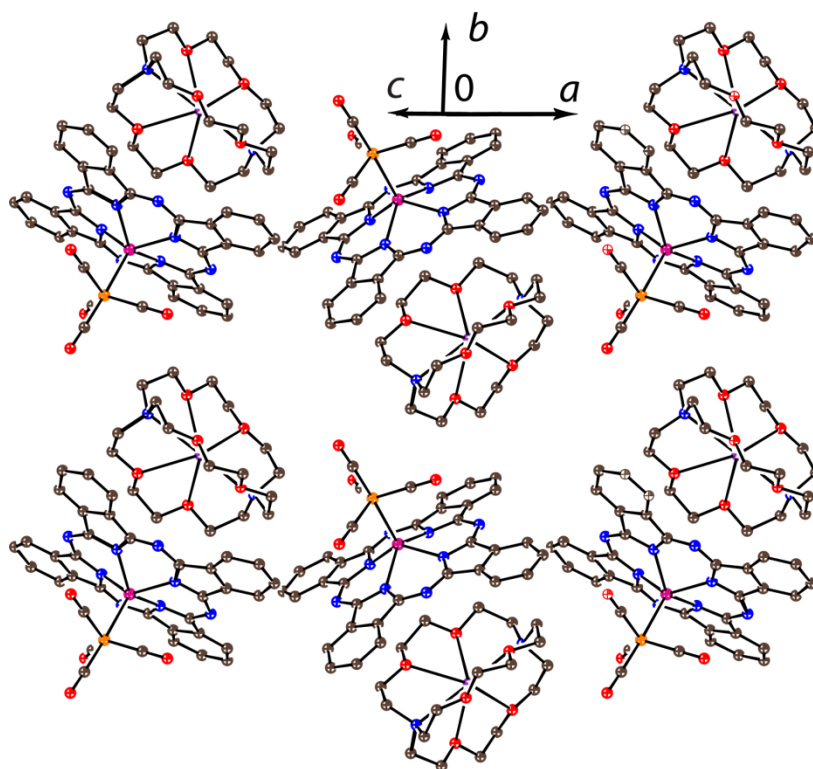

**Figure S14.** Crystal structure of  $\{\text{Cryptand}(\text{Na}^+)\}[\text{Fe}(\text{CO})_4 \cdot \text{Sn}^{\text{II}}(\text{Pc}^{*3-})] \cdot 2\text{C}_6\text{H}_4\text{Cl}_2$  (**9**). Solvent  $\text{C}_6\text{H}_4\text{Cl}_2$  molecules are not depicted. Ortep drawing with equivalent isotropic atomic displacement parameters is shown.

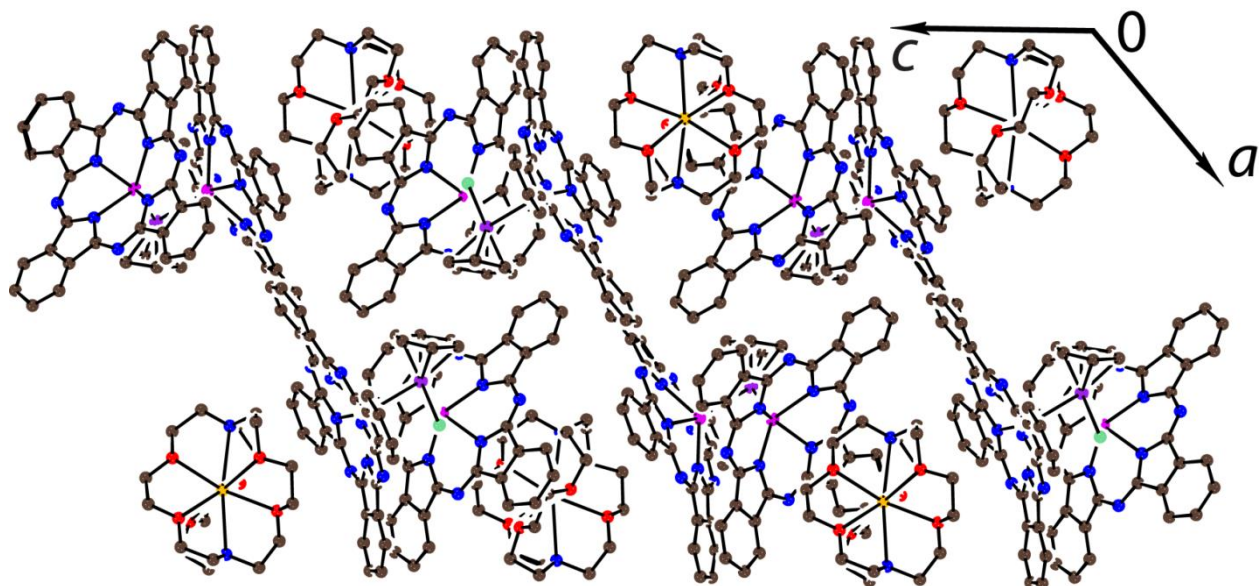

**Figure S15.** Crystal structure of  $\{\text{Cryptand}(\text{Na}^+)\}[(\text{C}_6\text{H}_6)\text{RuCl}_2 \cdot \{\text{Sn}^{\text{II}}(\text{Pc}^{\bullet 3-})\}_2] \cdot \text{C}_6\text{H}_4\text{Cl}_2$  (**10**). Solvent  $\text{C}_6\text{H}_4\text{Cl}_2$  molecules are not depicted. Ortep drawing with equivalent isotropic atomic displacement parameters is shown.

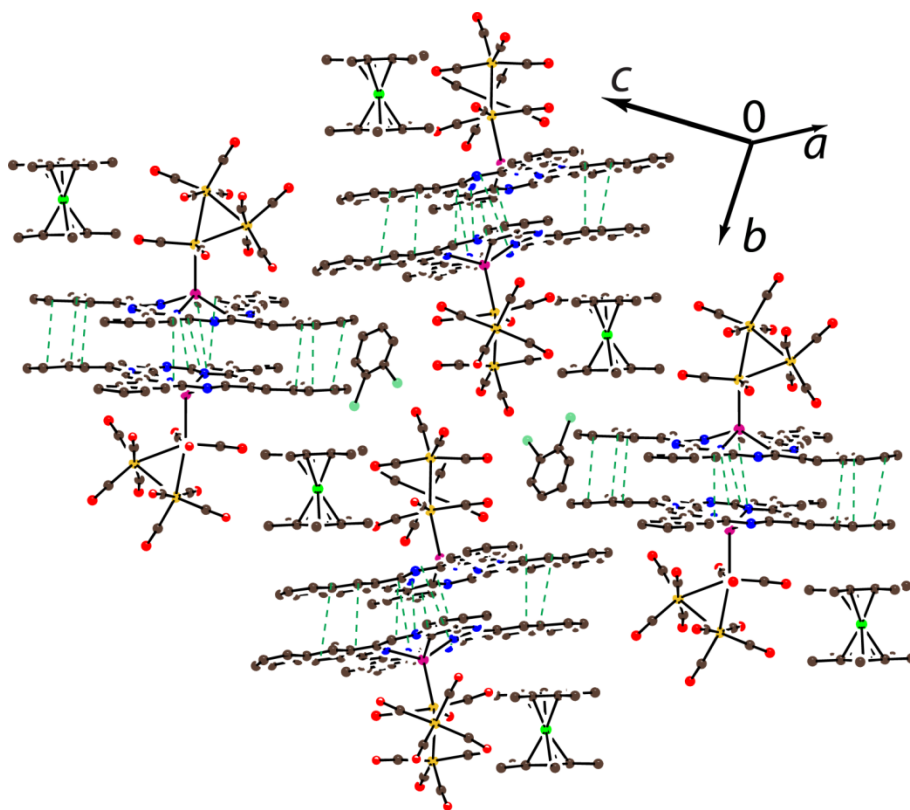

**Figure S16.** Crystal structure of  $\{\text{Cp}^*_2\text{Cr}^+\}[\text{Os}_3(\text{CO})_{11}\cdot\text{Sn}^{\text{II}}(\text{Nc}^{3-})] \cdot 2\text{C}_6\text{H}_4\text{Cl}_2$  (**13**). Ortep drawing with equivalent isotropic atomic displacement parameters is shown. Van der Waals C,N...C,N contacts are shown by green dashed lines.



### Magnetic data for 6

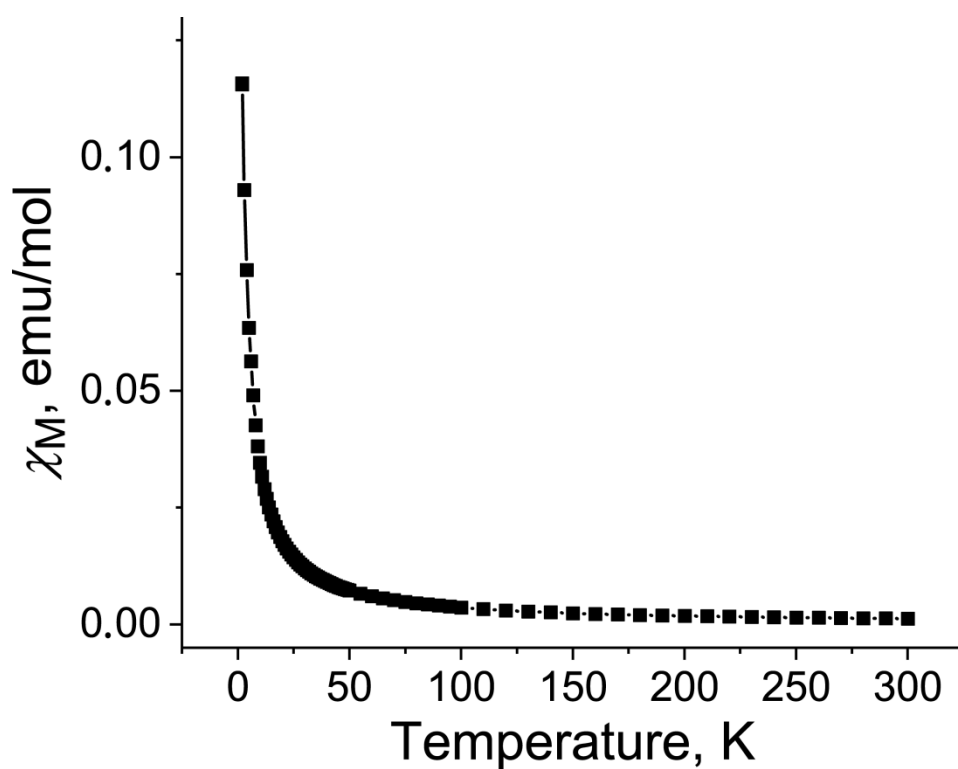

Figure S17. Temperature dependence of molar magnetic susceptibility of polycrystalline 6.

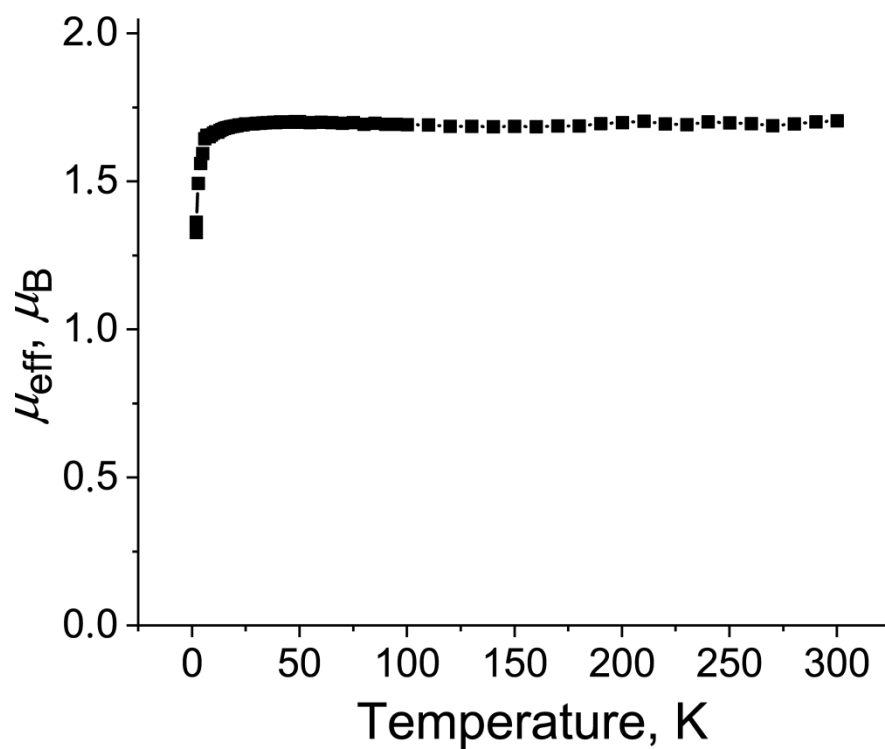

Figure S18. Temperature dependence of effective magnetic moment of polycrystalline 6

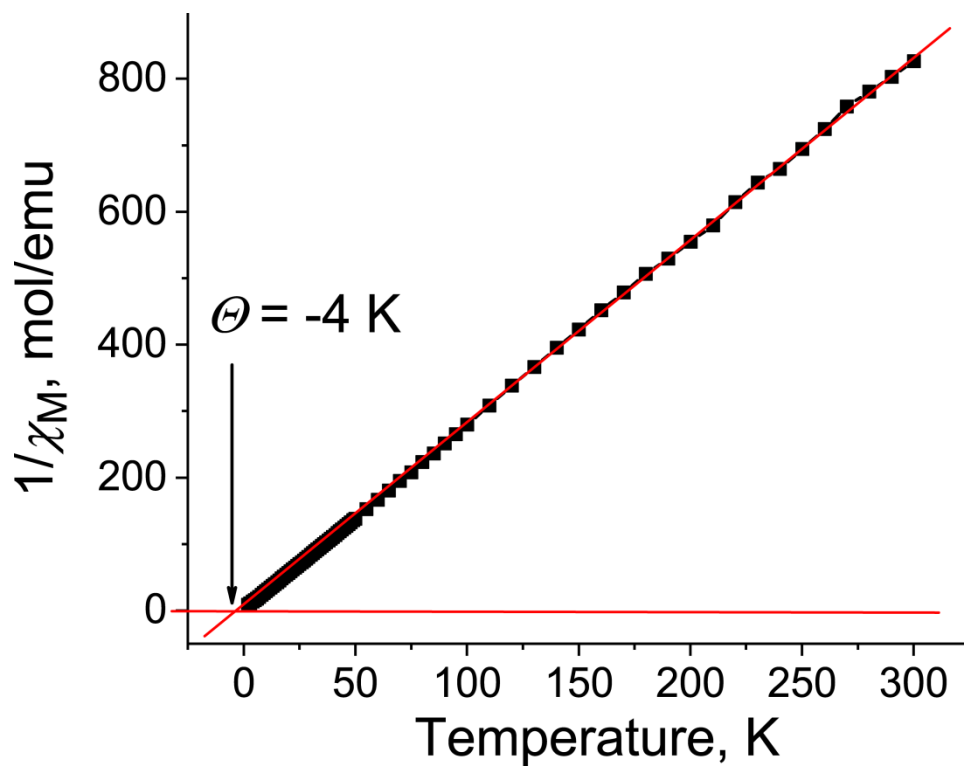

**Figure S19.** Temperature dependence of reciprocal molar magnetic susceptibility of polycrystalline 6.

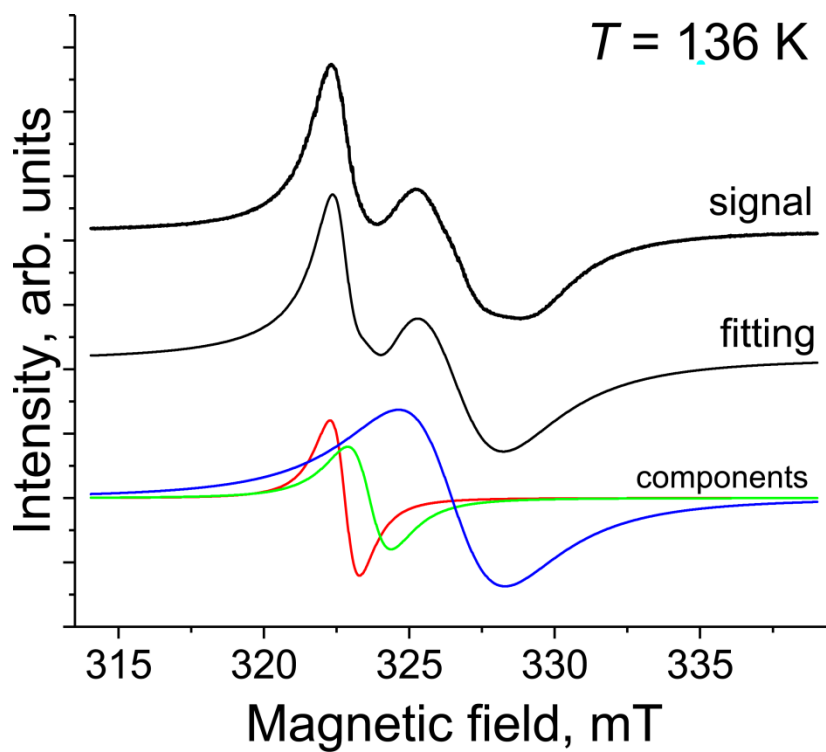

**Figure S20.** EPR spectrum of polycrystalline **6** at 136 K.

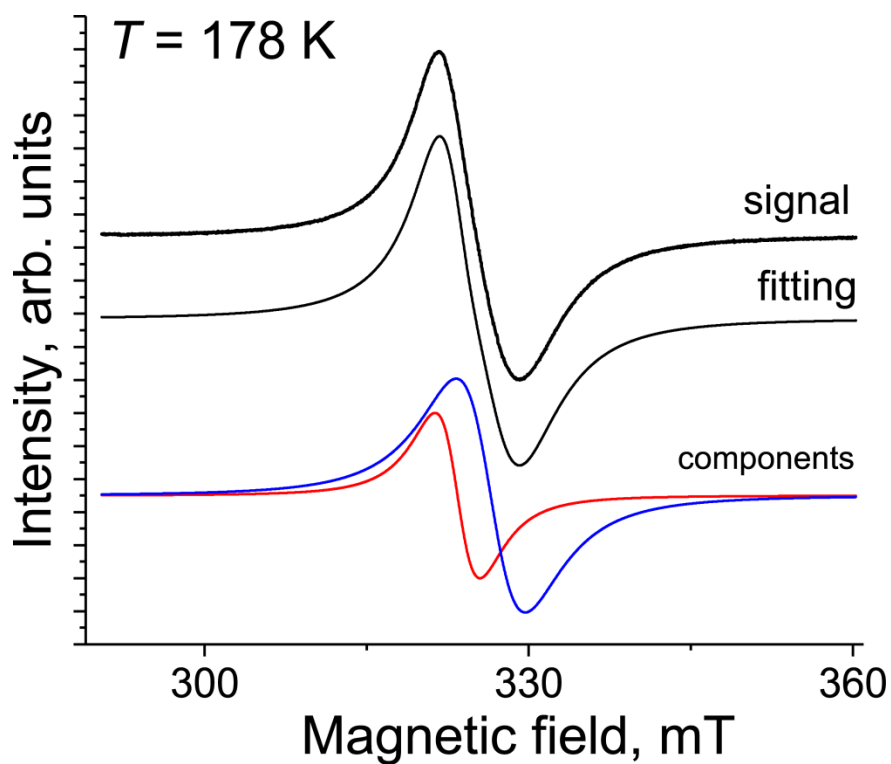

**Figure S21.** EPR spectrum of polycrystalline **6** at 178 K.

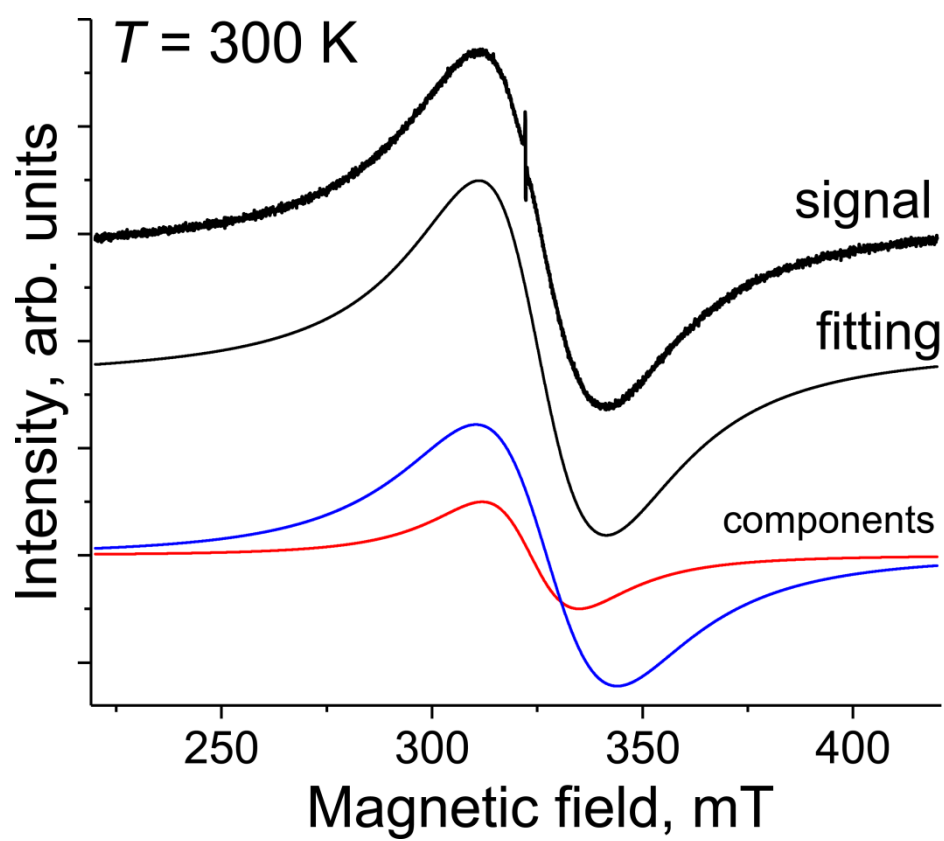

**Figure S22.** EPR spectrum of polycrystalline **6** at 300 K.

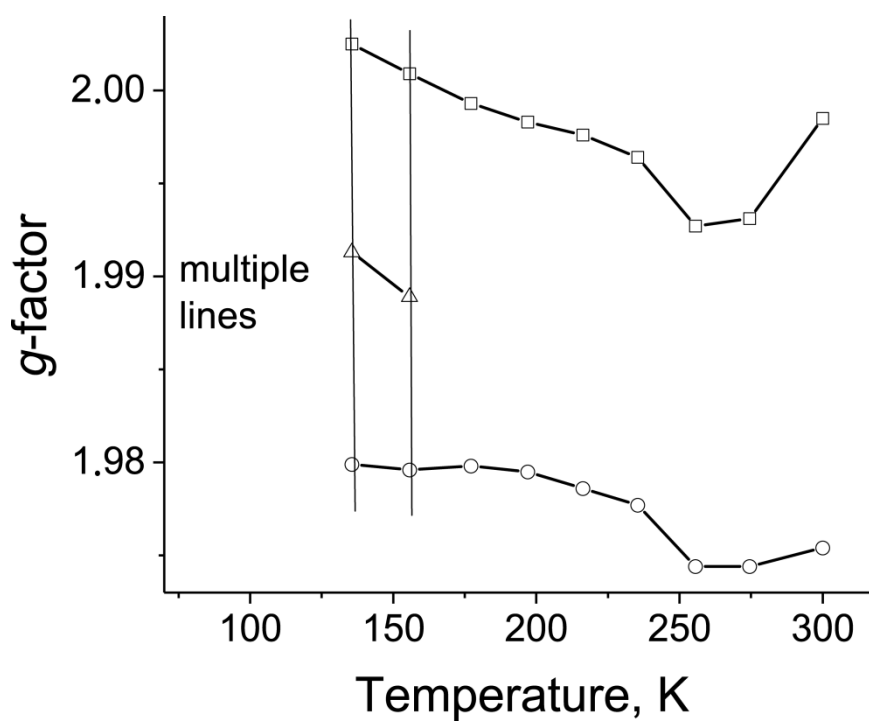

**Figure S23.** Temperature dependence of  $g$ -factors of the components of EPR signal from polycrystalline **6**.

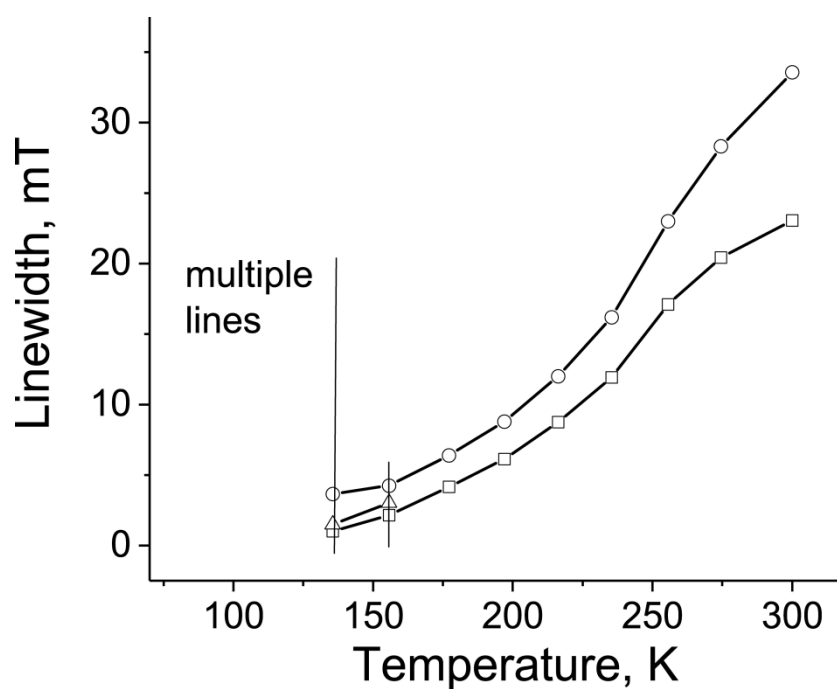

**Figure S24.** Temperature dependence of the linewidth of the components of EPR signal from polycrystalline **6**.

Magnetic data for 11.

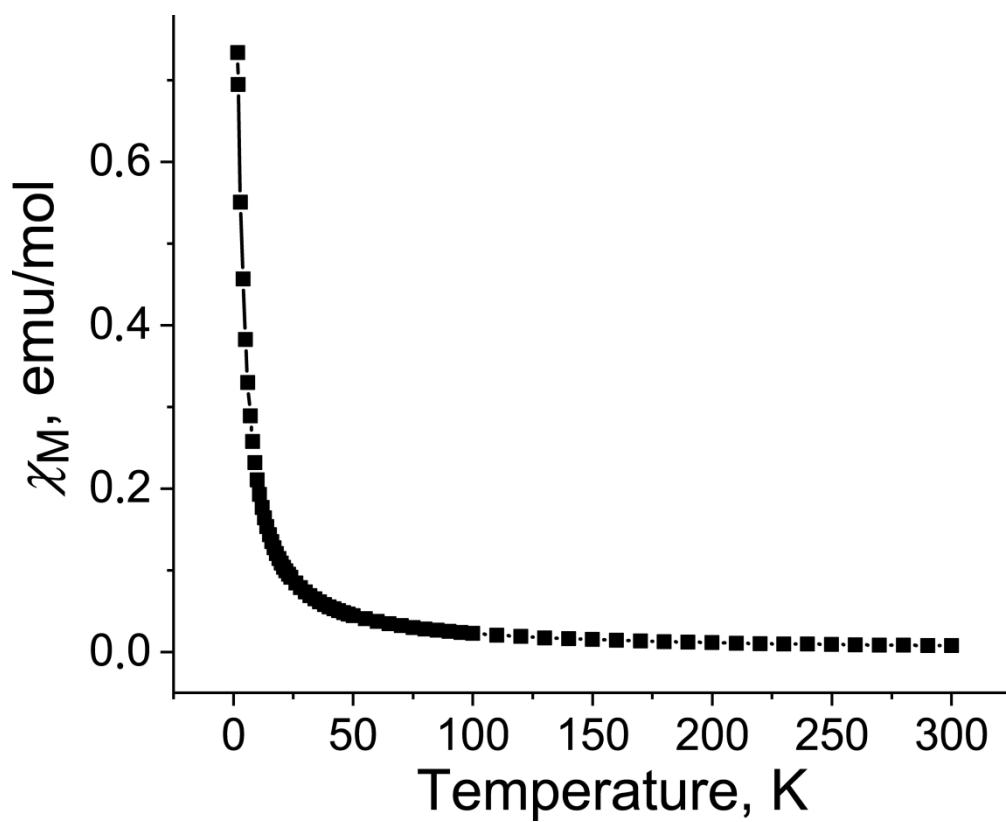

**Figure S25.** Temperature dependence of molar magnetic susceptibility of polycrystalline **11**.

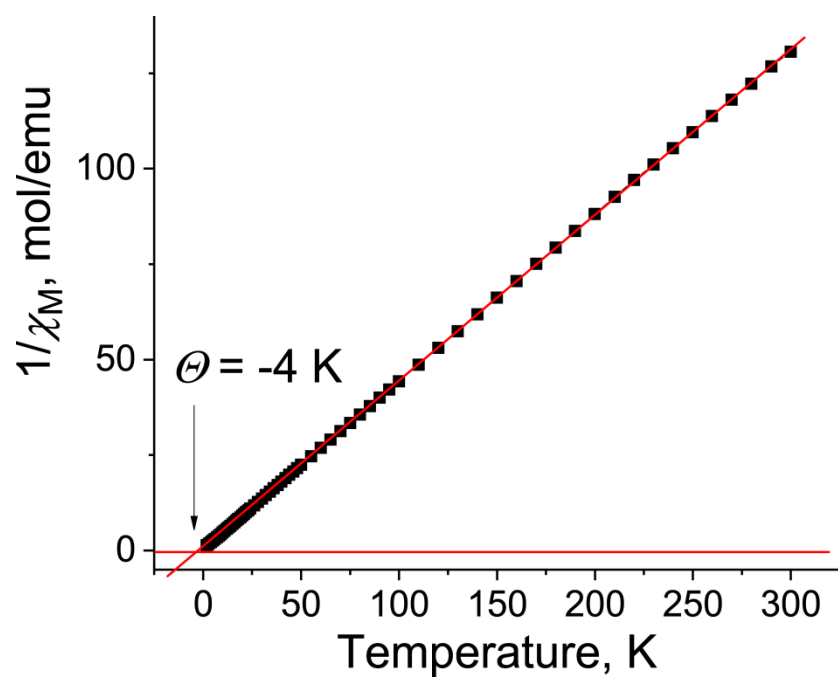

**Figure S26.** Temperature dependence of reciprocal molar magnetic susceptibility of polycrystalline **11**.

Magnetic data for 12.

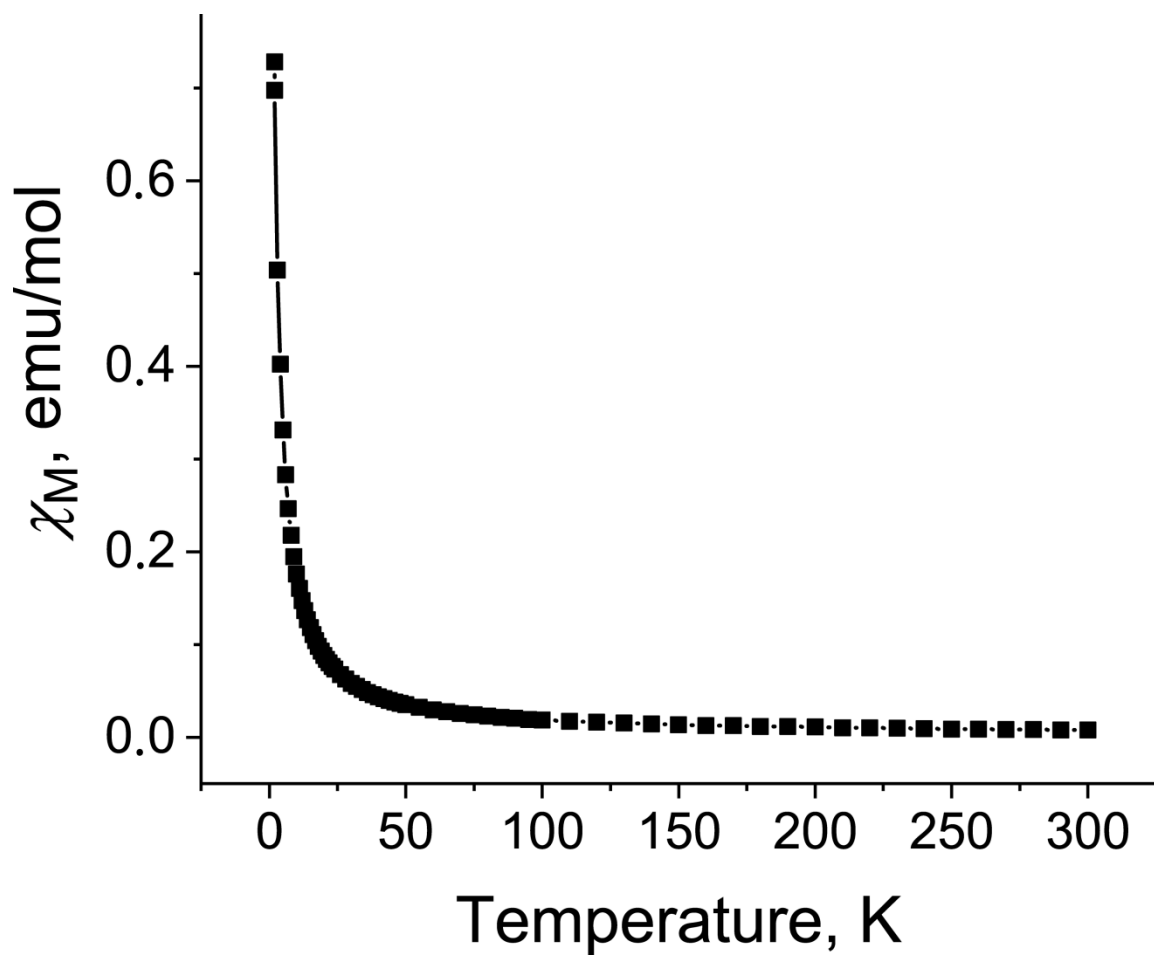

Figure S27. Temperature dependence of molar magnetic susceptibility of polycrystalline 12.
